# Supplementary material for: Population Immunity against Serotype-2 Poliomyelitis Leading up to the Global Withdrawal of the Oral Poliovirus Vaccine: Spatio-temporal Modelling of Surveillance Data
Source: PubMed Central journal article supplement (PMC5049753; doi:10.1371/journal.pmed.1002140), 2016-10-04

## S2 Text

Crude and estimated serotype-2 population immunity in Nigeria by district and 6-month period from Jan-Jun 2004 to Jan-Jun 2015

Figure XXXII. Crude (black circles) and estimated (red points) serotype-2 population immunity in each district of Nigeria and 6-month period from Jan-Jun 2004 to Jan-Jun 2015 presented by state in alphabetical order. The size of the black circles indicates the number of non-polio AFP cases that informed that estimate.

ABIA

Smoothed estimate ●  
 Crude estimate, size increases with no. npAFP: ○1 ○10 ○20

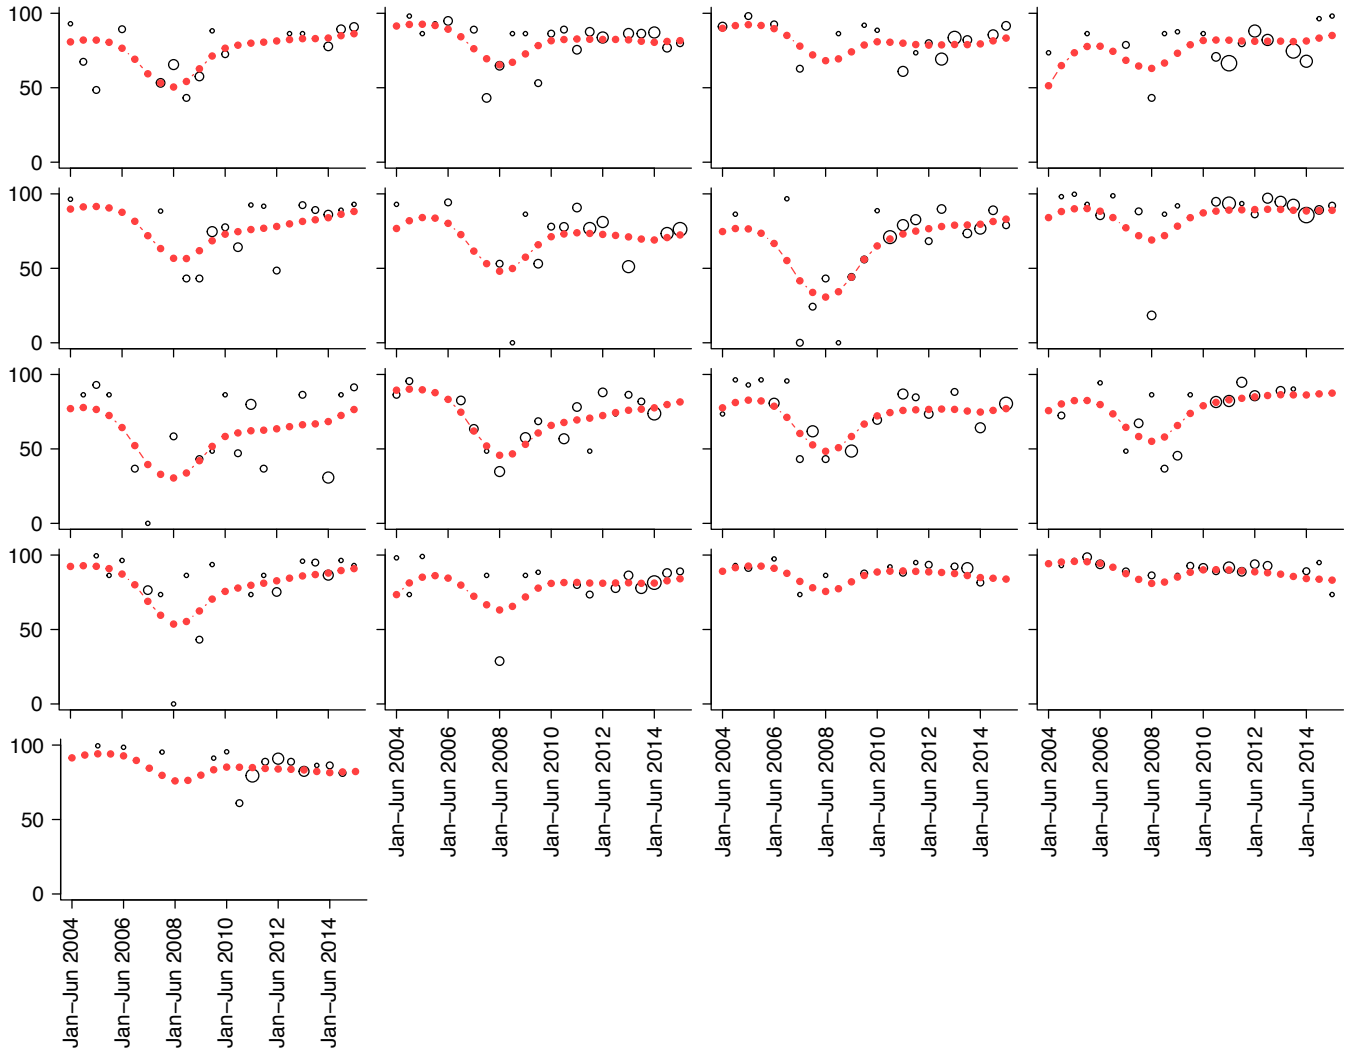

# ADAMAWA

Smoothed estimate ●  
Crude estimate, size increases with no. npAFP: ○1 ○10 ○20

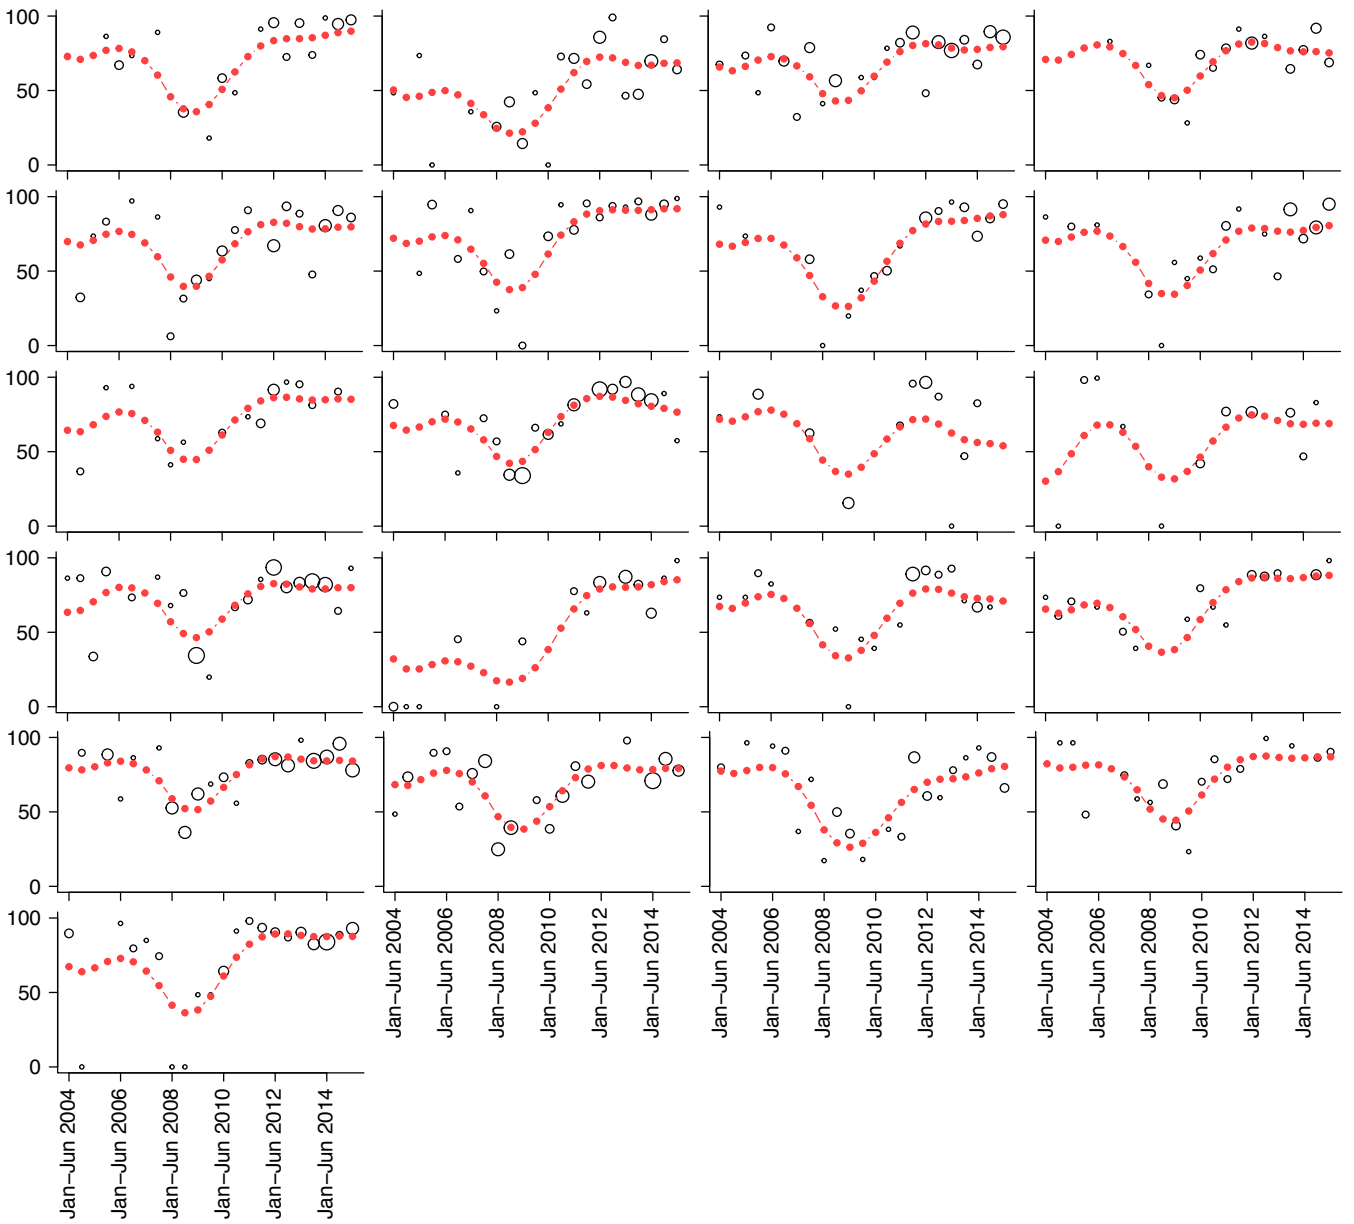

# AKWA IBOM

Smoothed estimate ●  
Crude estimate, size increases with no. npAFP: ○1 ○10 ○20

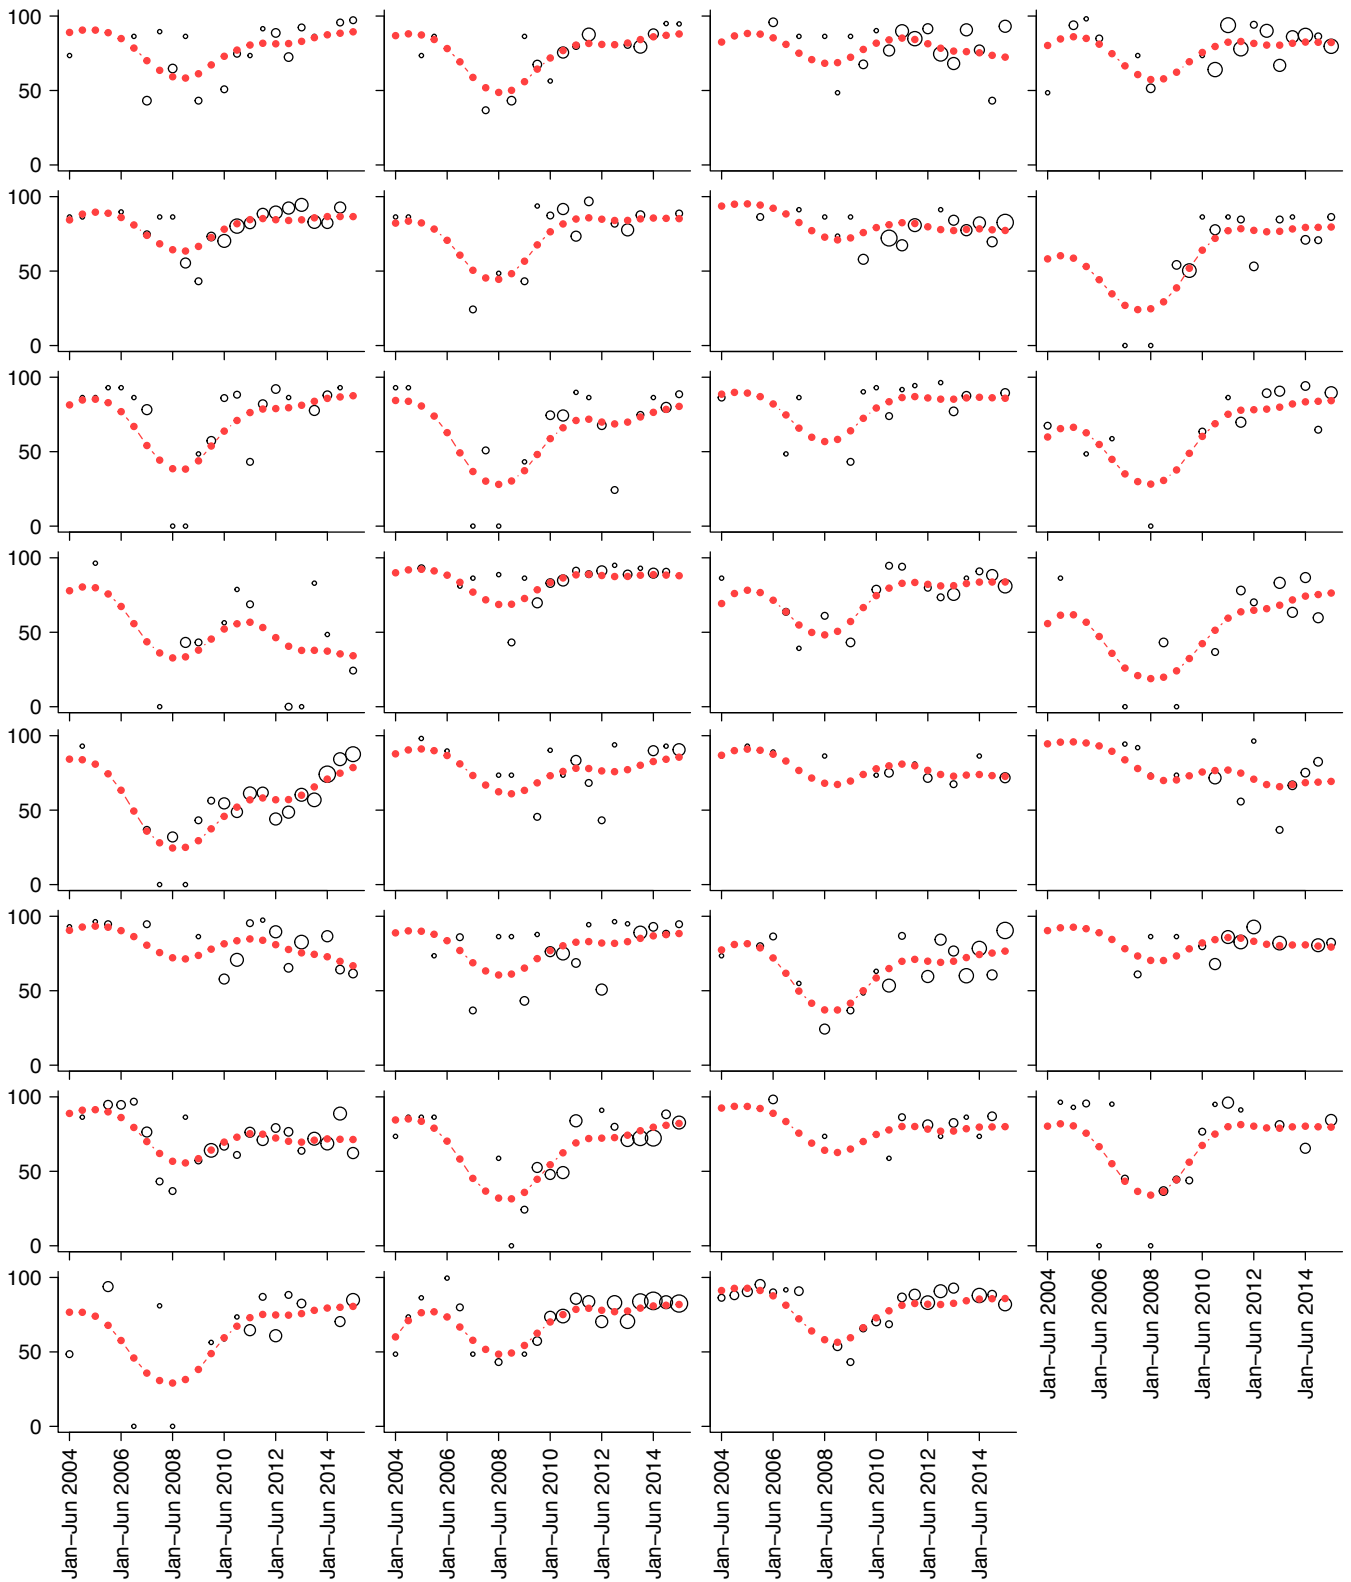



# ANAMBRA

Smoothed estimate ●  
Crude estimate, size increases with no. npAFP: ○1 ○10 ○20

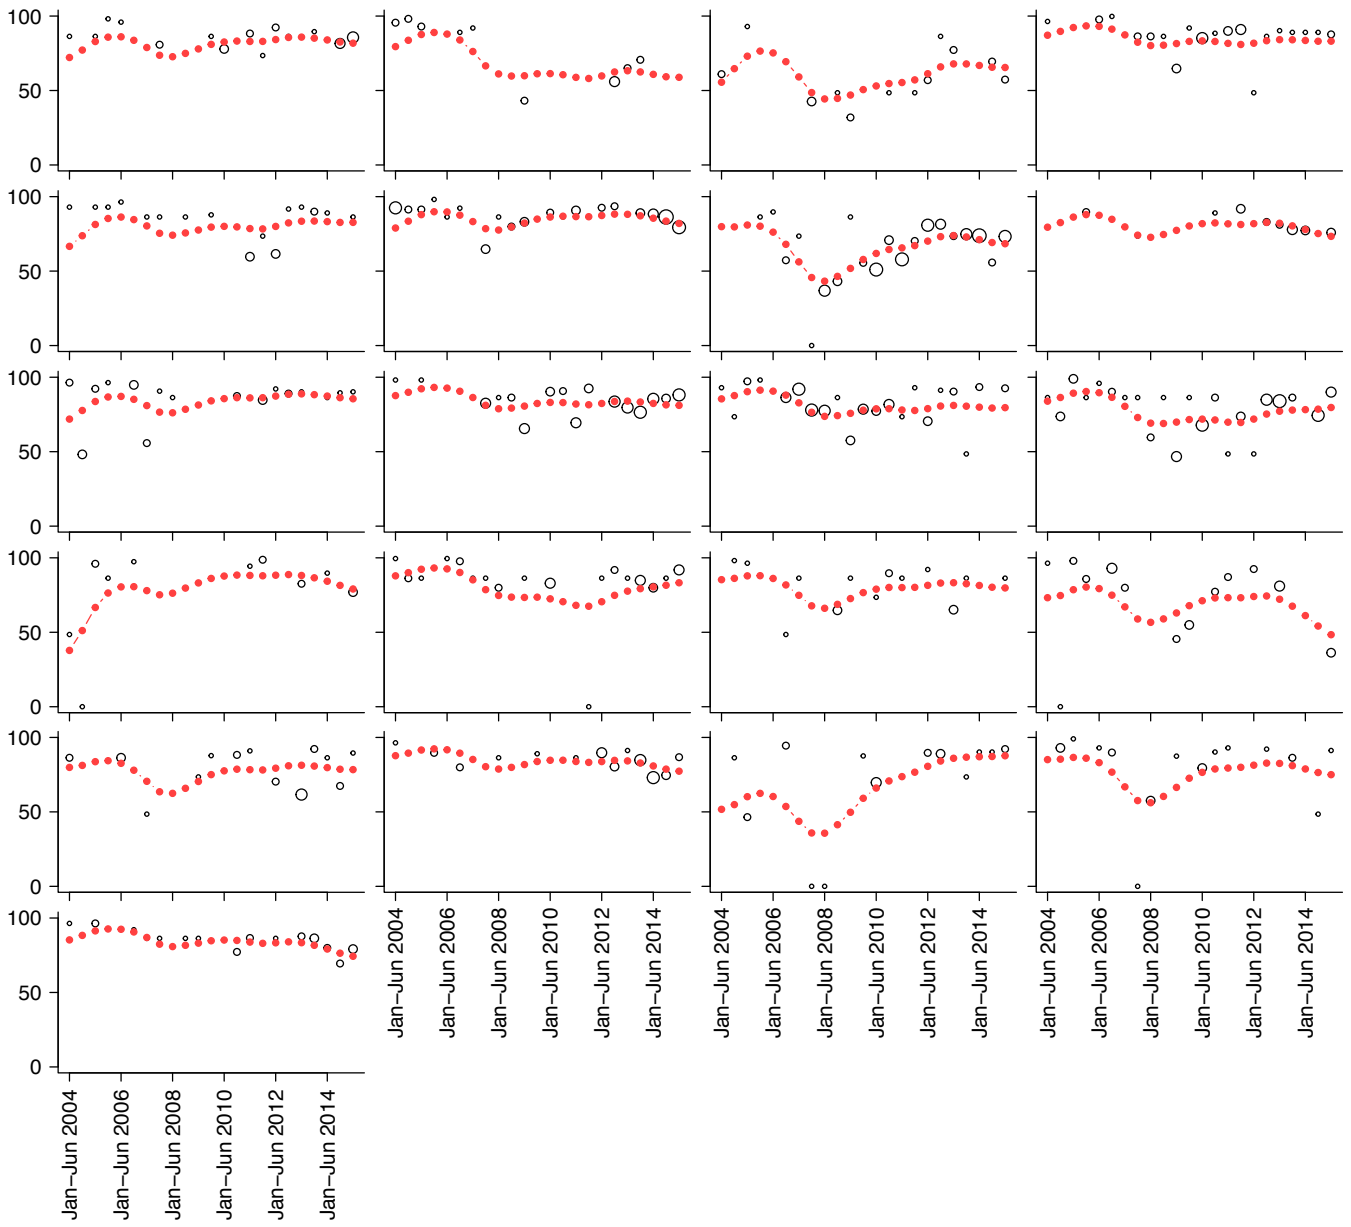

# BAUCHI

Smoothed estimate ●  
Crude estimate, size increases with no. npAFP: ○1 ○10 ○20

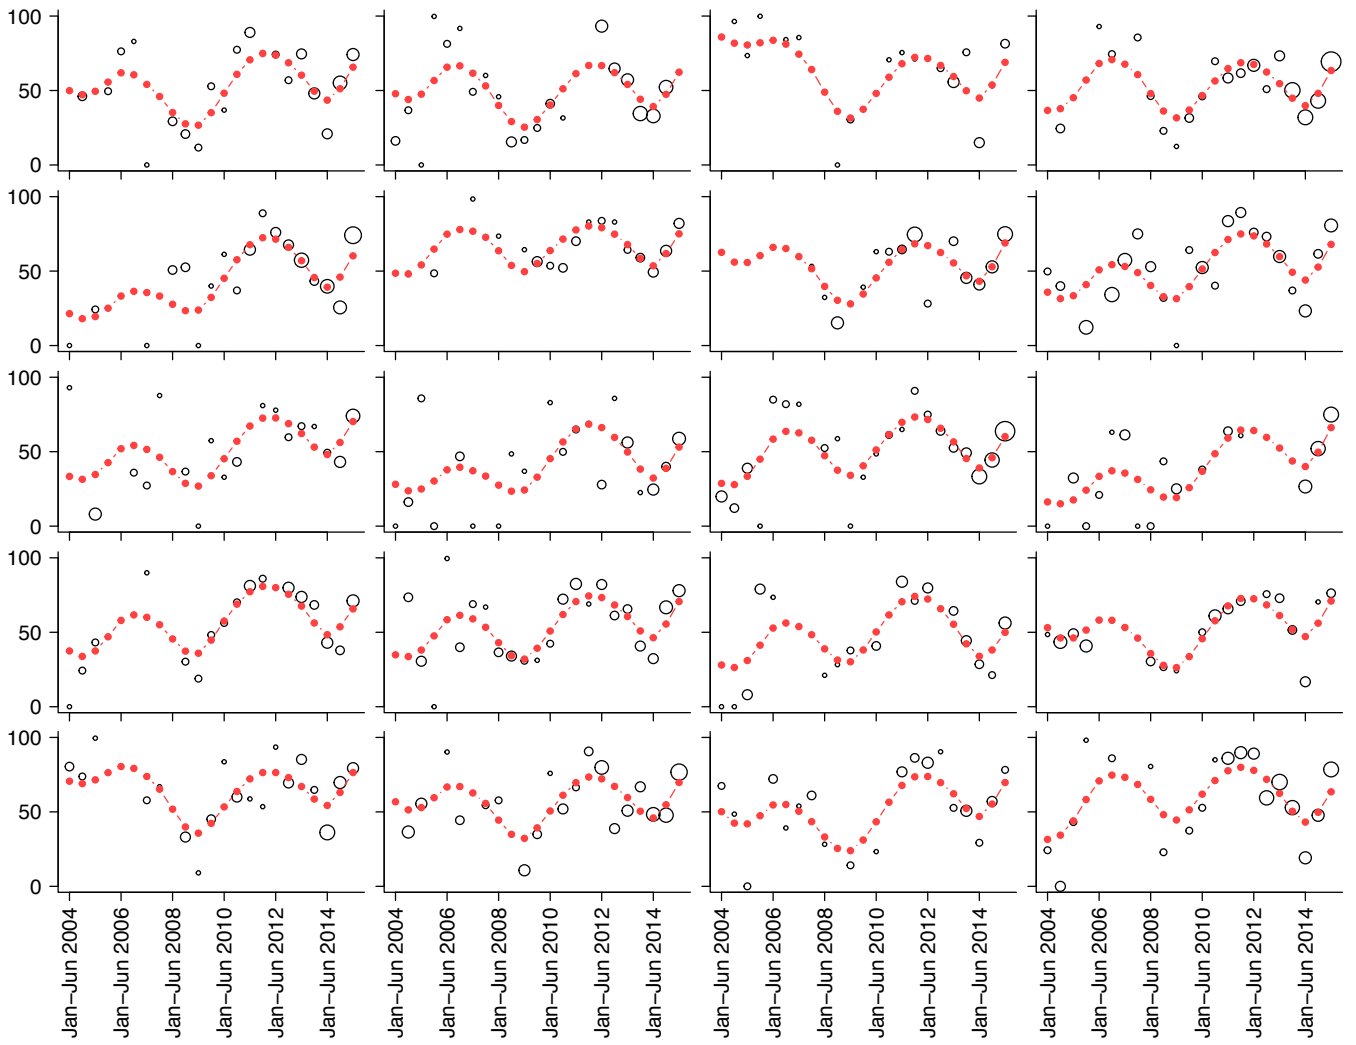

# BAYELSA

Smoothed estimate ●  
Crude estimate, size increases with no. npAFP: ○1 ○10 ○20

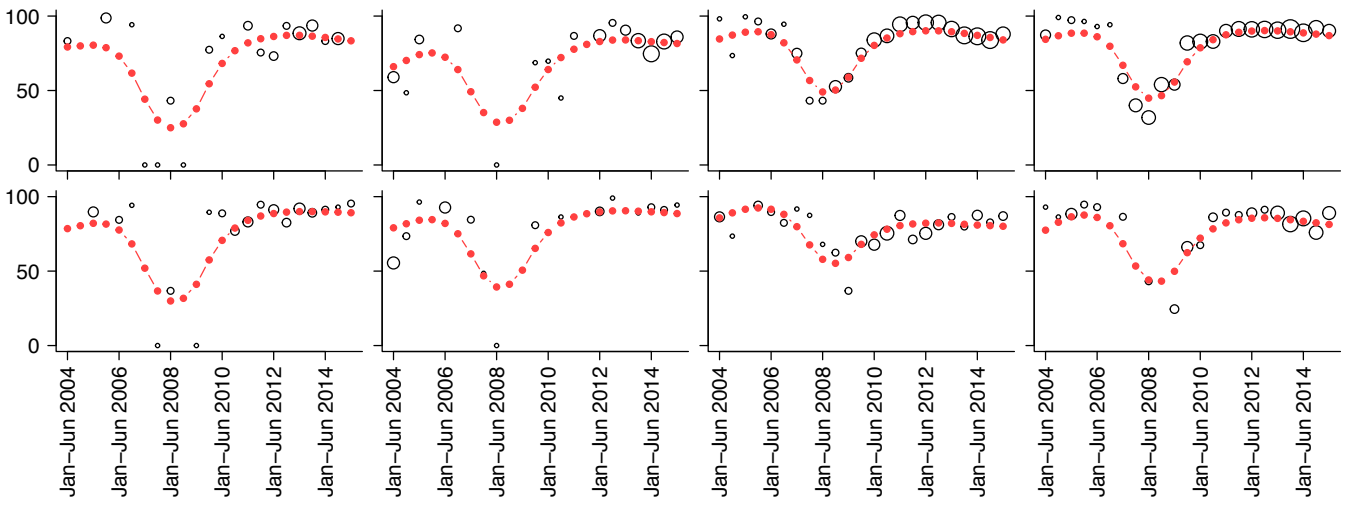

# BENUE

Smoothed estimate ●  
Crude estimate, size increases with no. npAFP: ○1 ○10 ○20

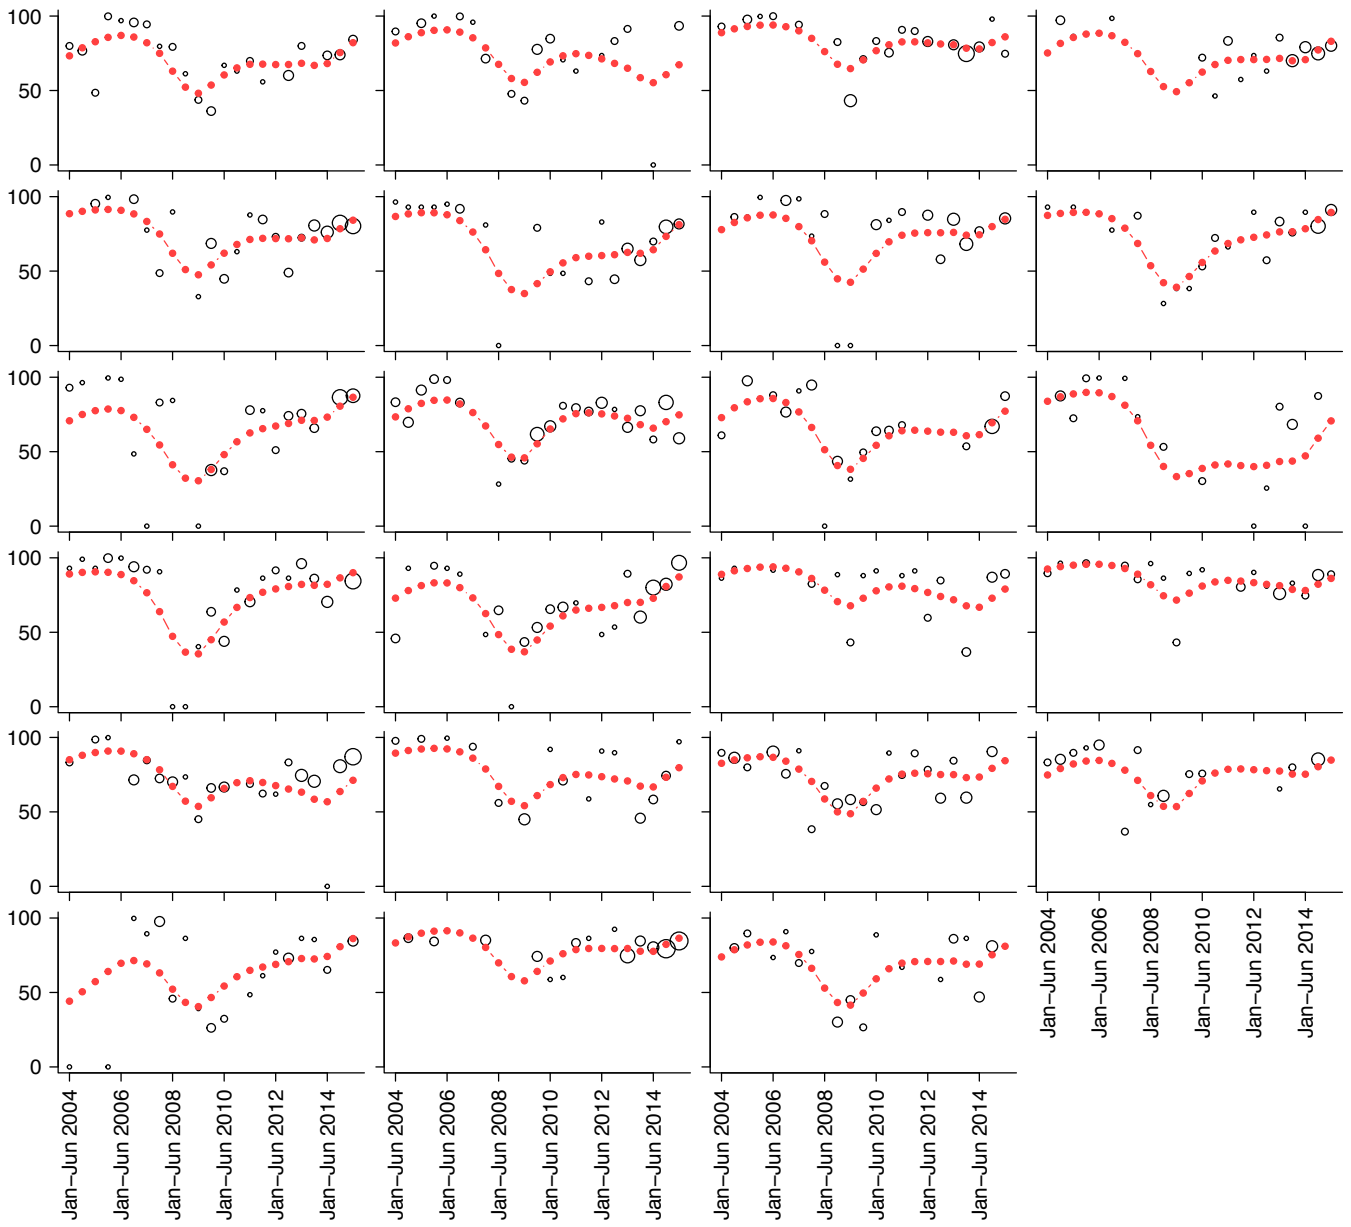

# BORNO

Smoothed estimate ●  
Crude estimate, size increases with no. npAFP: ○1 ○10 ○20

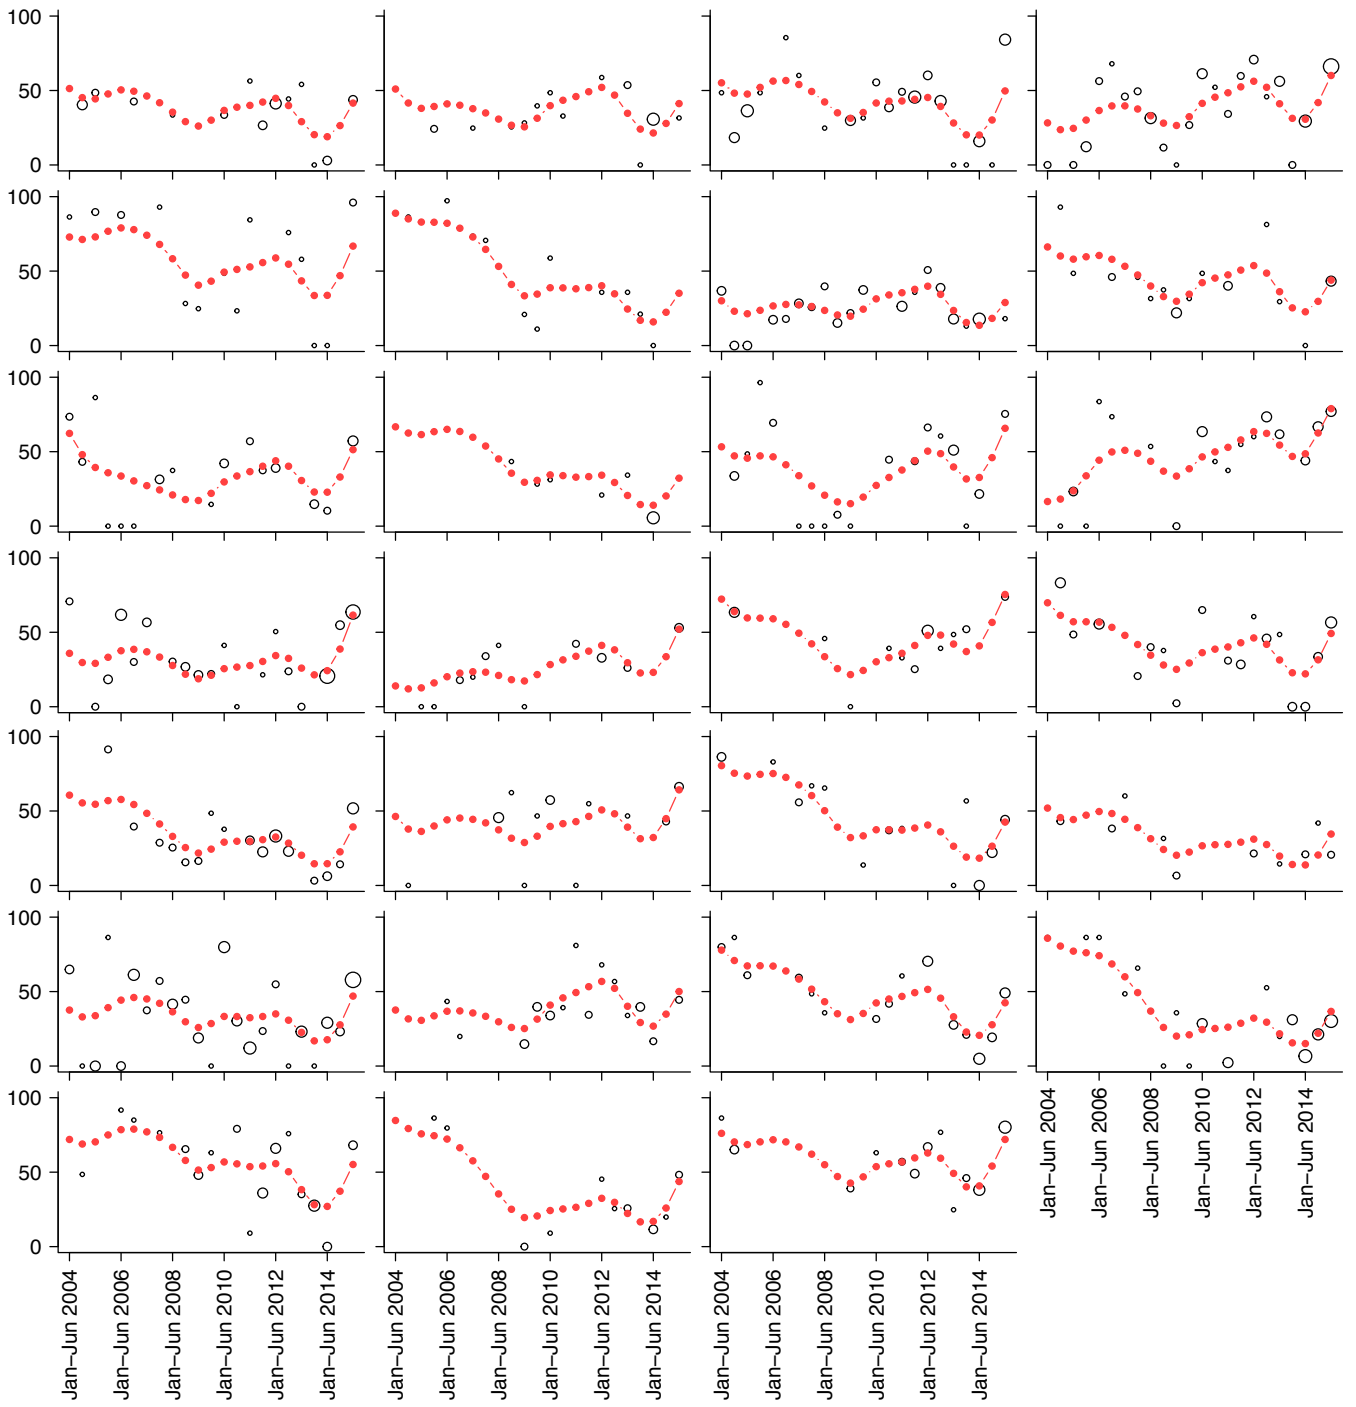

# CROSS RIVER

Smoothed estimate ●  
 Crude estimate, size increases with no. npAFP: ○1 ○10 ○20

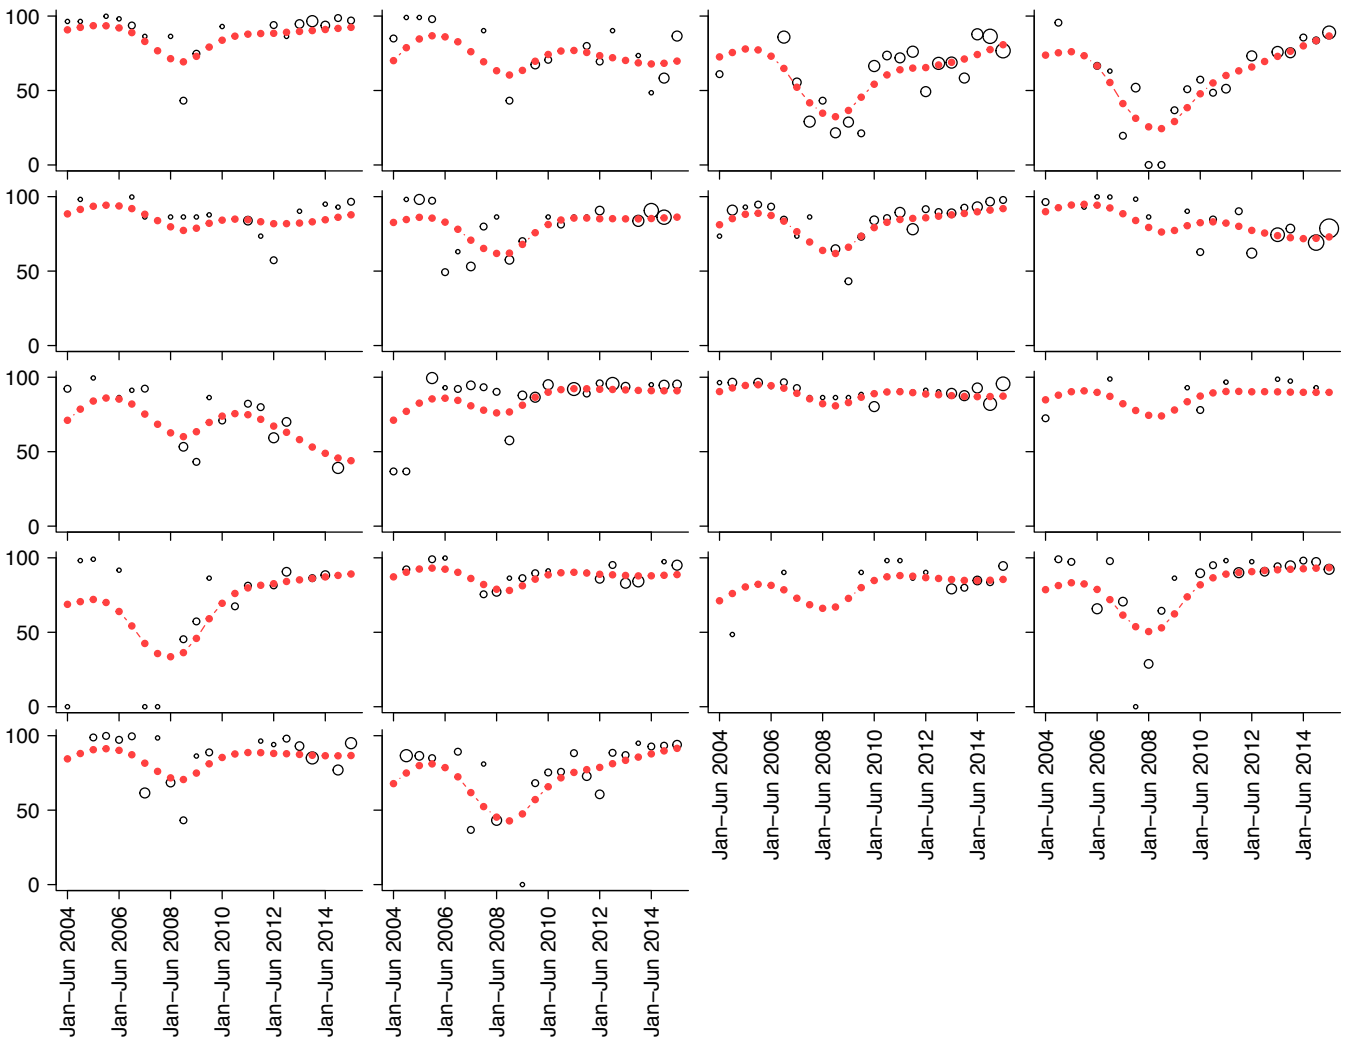

# DELTA

Smoothed estimate ●  
Crude estimate, size increases with no. npAFP: ○1 ○10 ○20

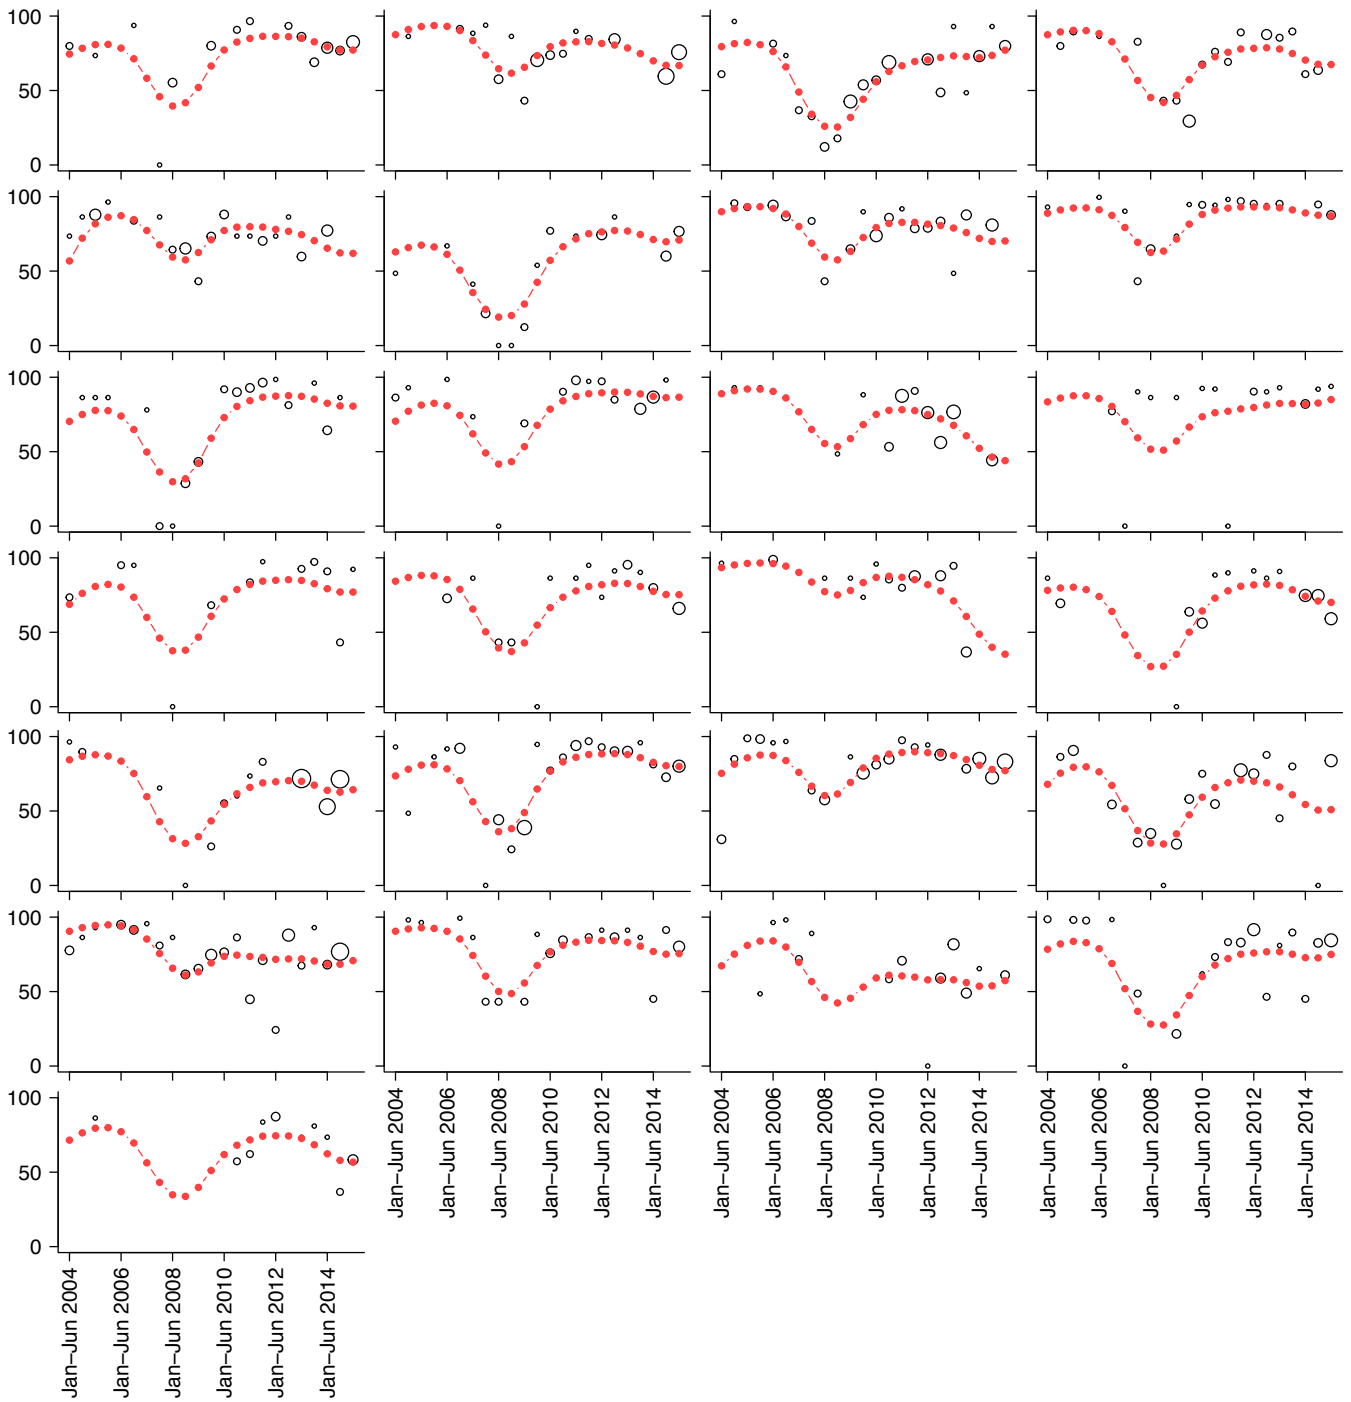

# EBONYI

Smoothed estimate ●  
Crude estimate, size increases with no. npAFP: ○1 ○10 ○20

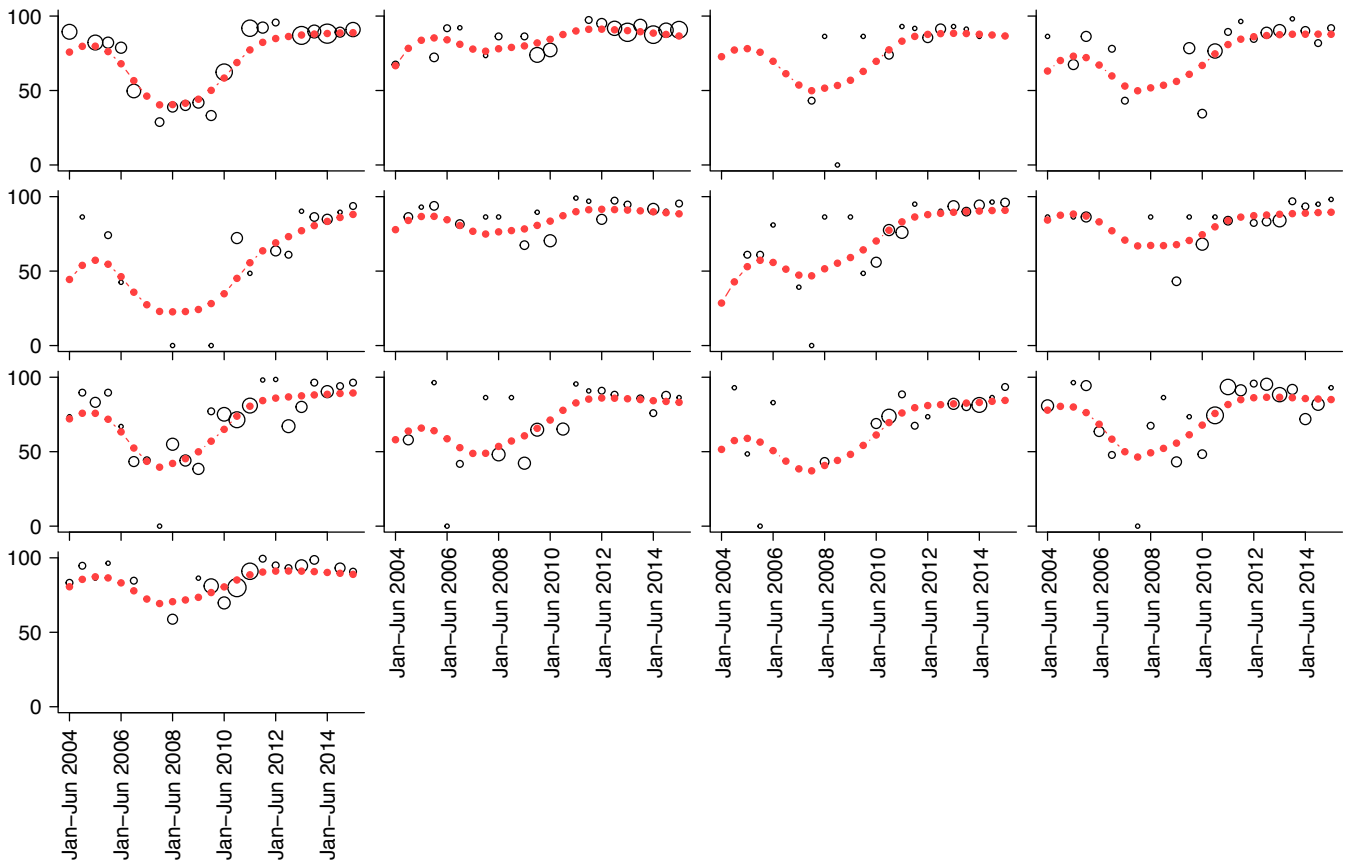



# EDO

Smoothed estimate ●  
Crude estimate, size increases with no. npAFP: ○1 ○10 ○20

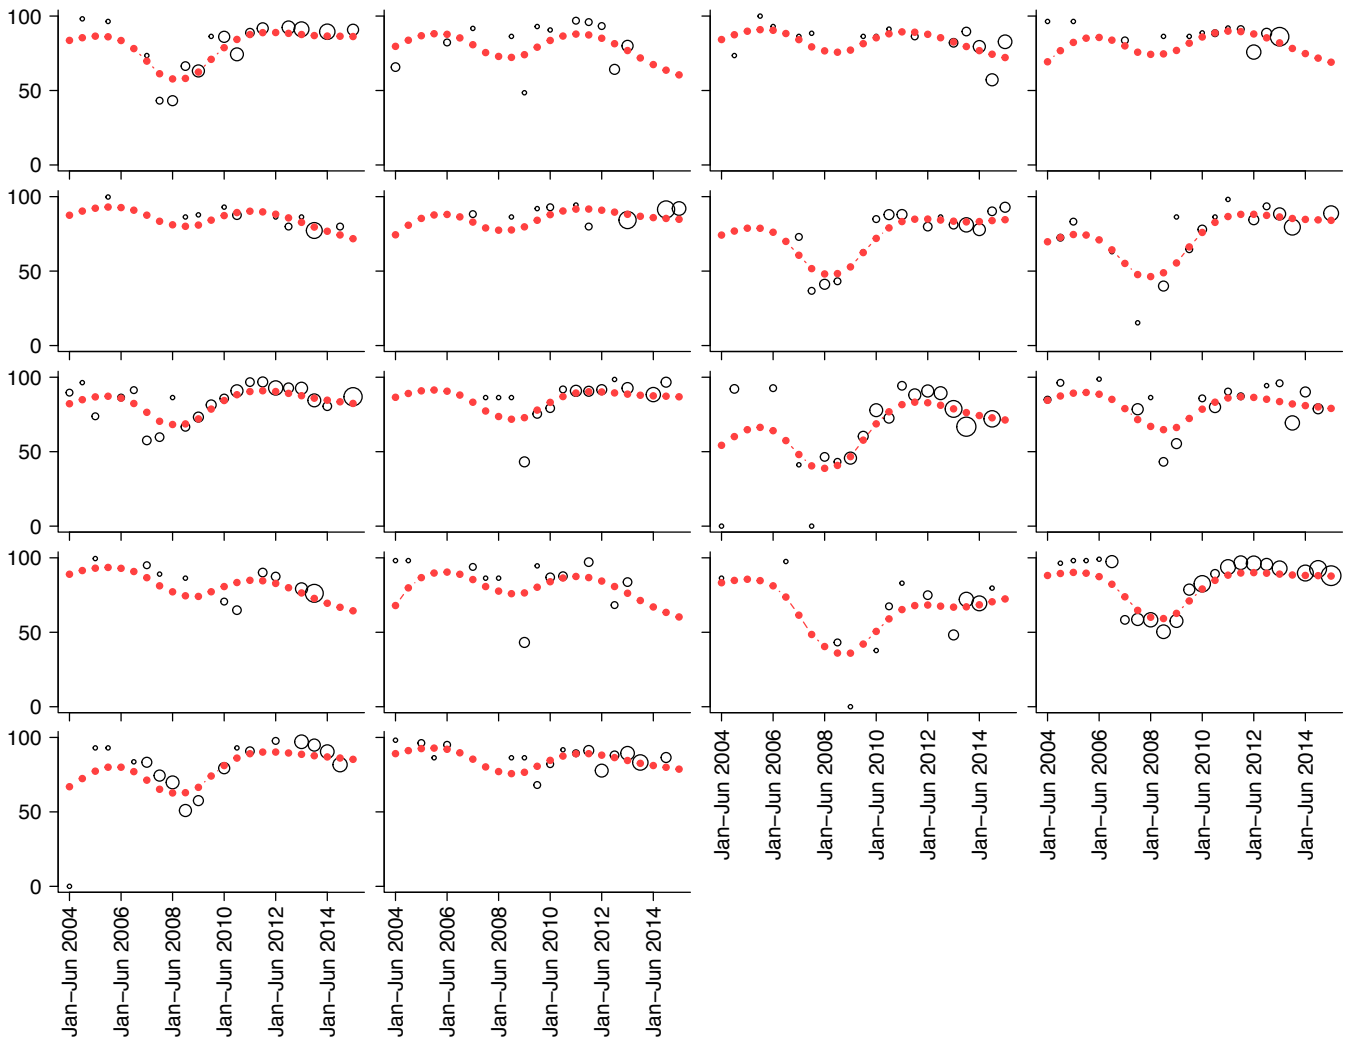

# EKITI

Smoothed estimate ●  
Crude estimate, size increases with no. npAFP: ○1 ○10 ○20

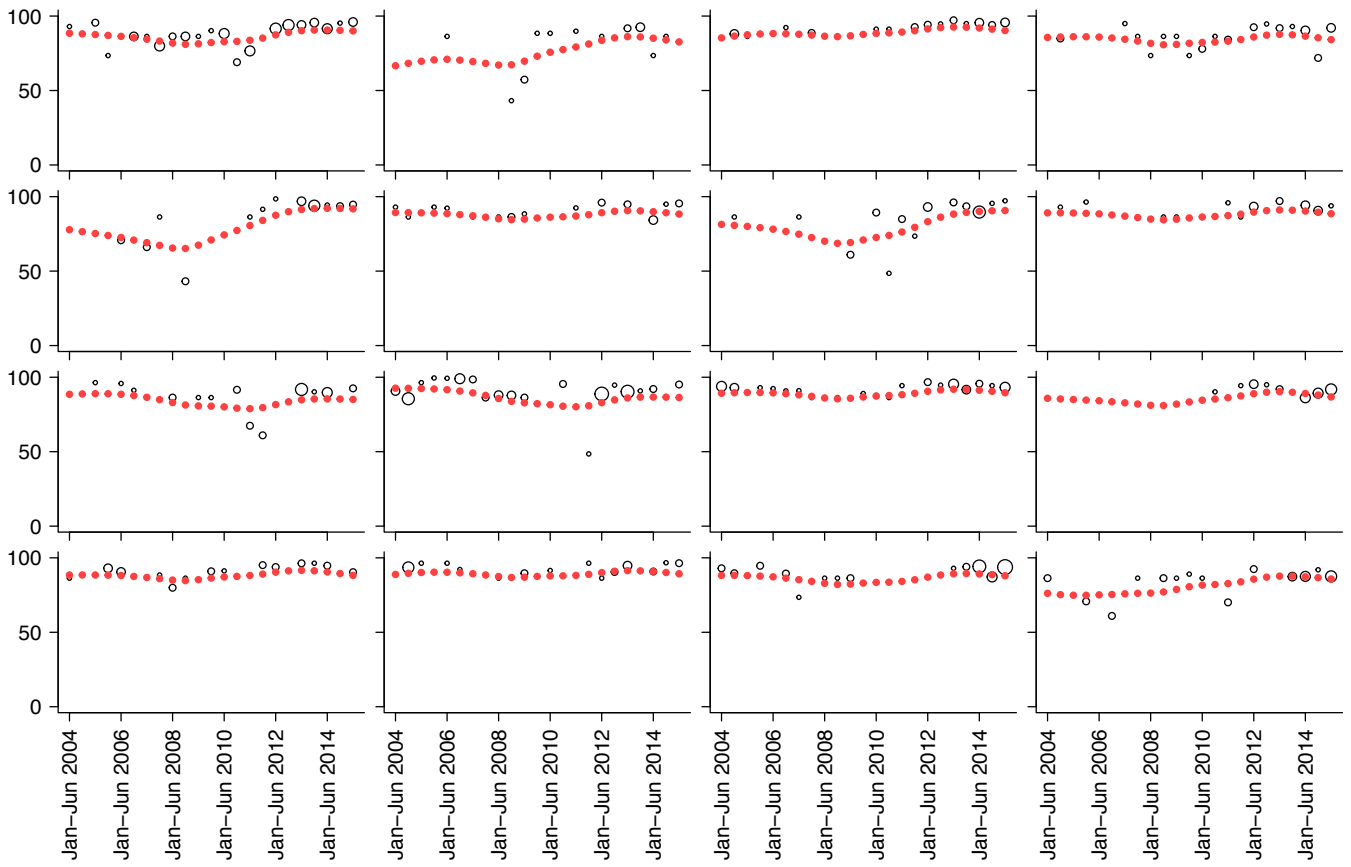

# ENUGU

Smoothed estimate ●  
Crude estimate, size increases with no. npAFP: ○1 ○10 ○20

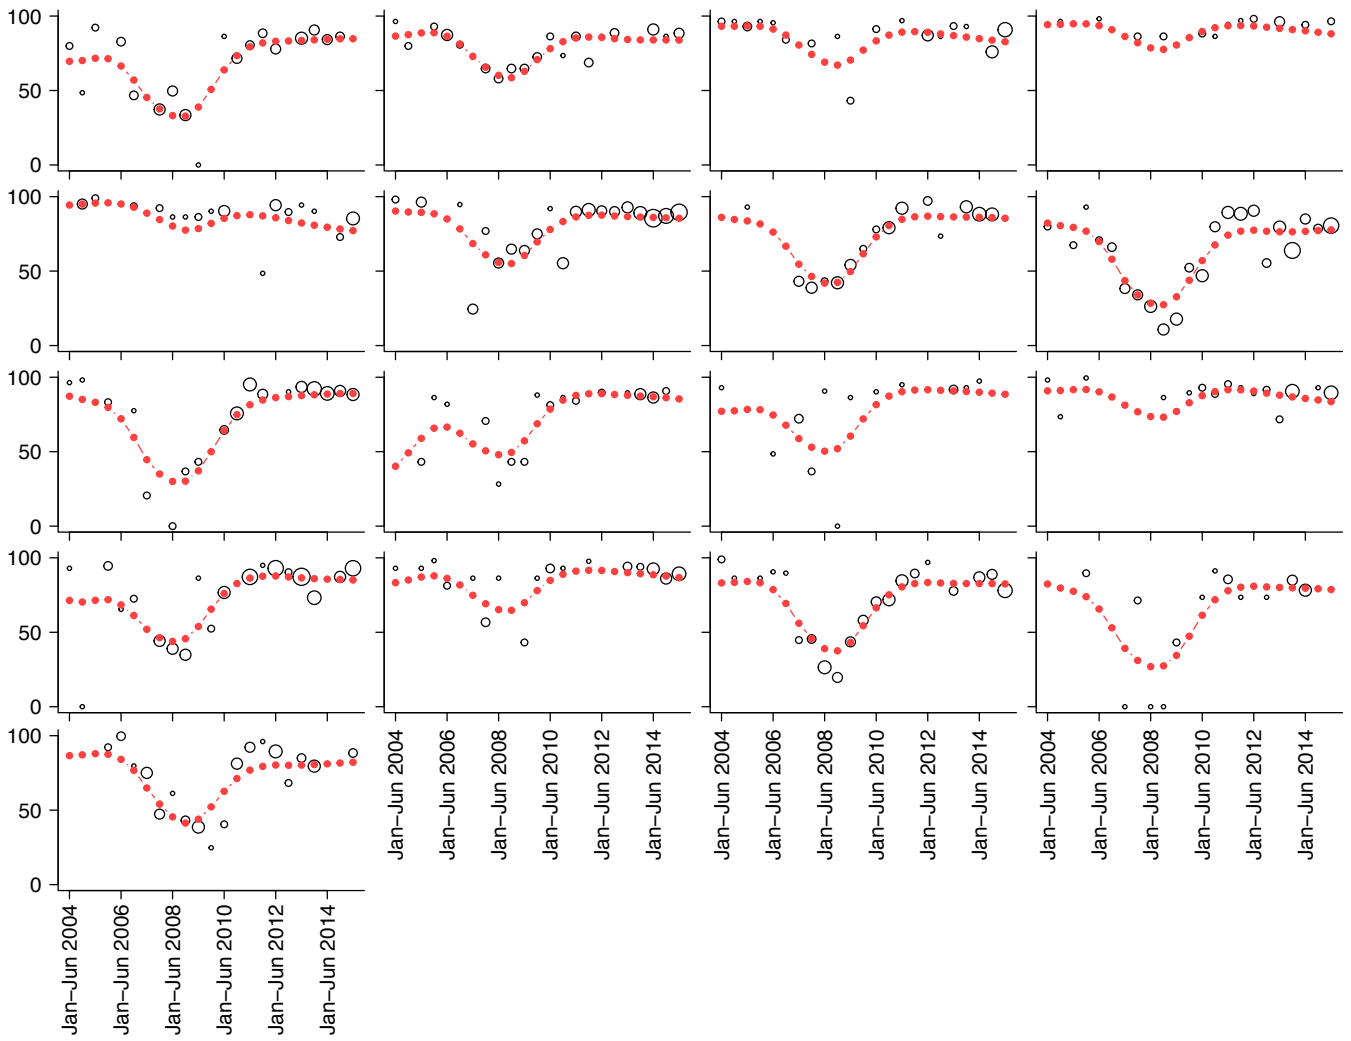

# FCT ABUJA

Smoothed estimate ●  
Crude estimate, size increases with no. npAFP: ○1 ○10 ○20

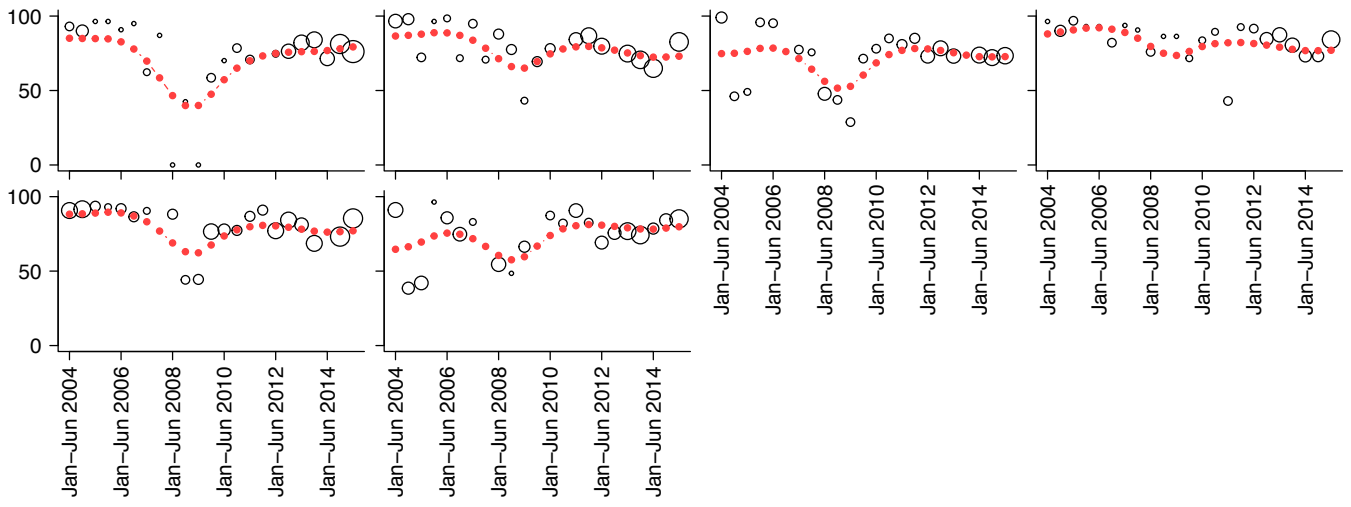

# GOMBE

Smoothed estimate ●  
Crude estimate, size increases with no. npAFP: ○1 ○10 ○20

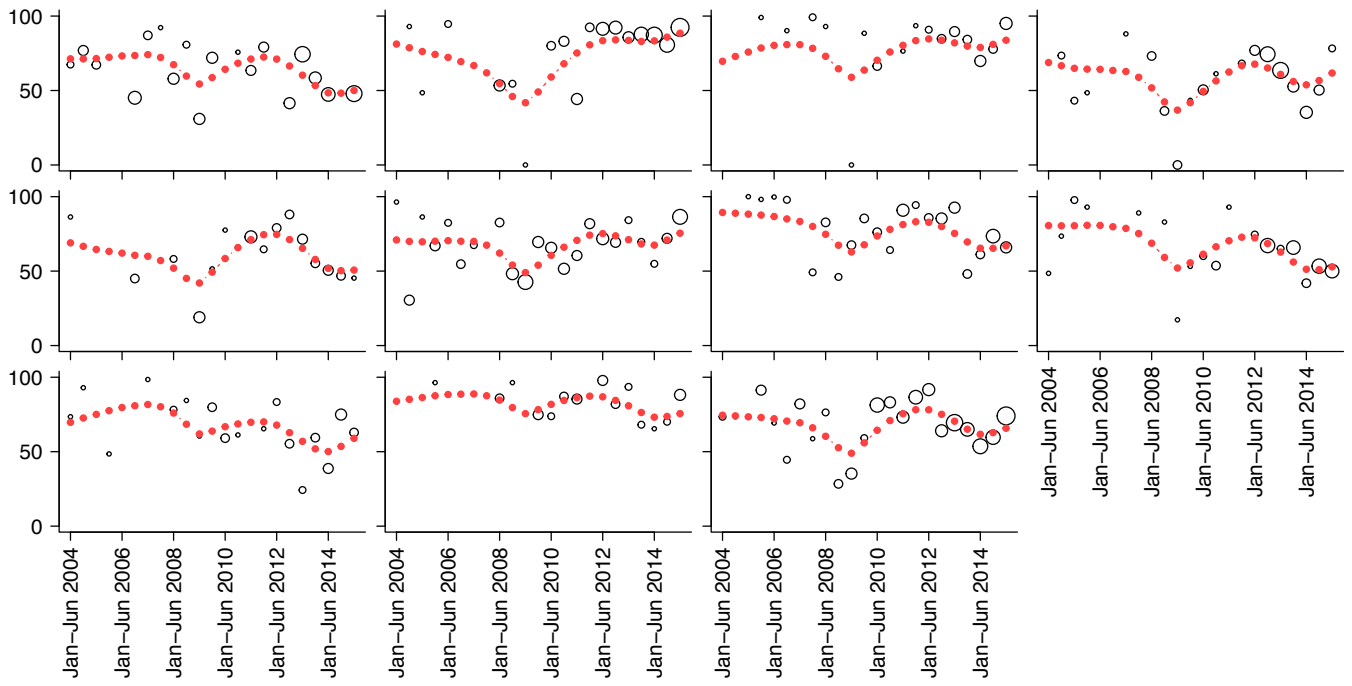

# IMO

Smoothed estimate ●  
Crude estimate, size increases with no. npAFP: ○1 ○10 ○20

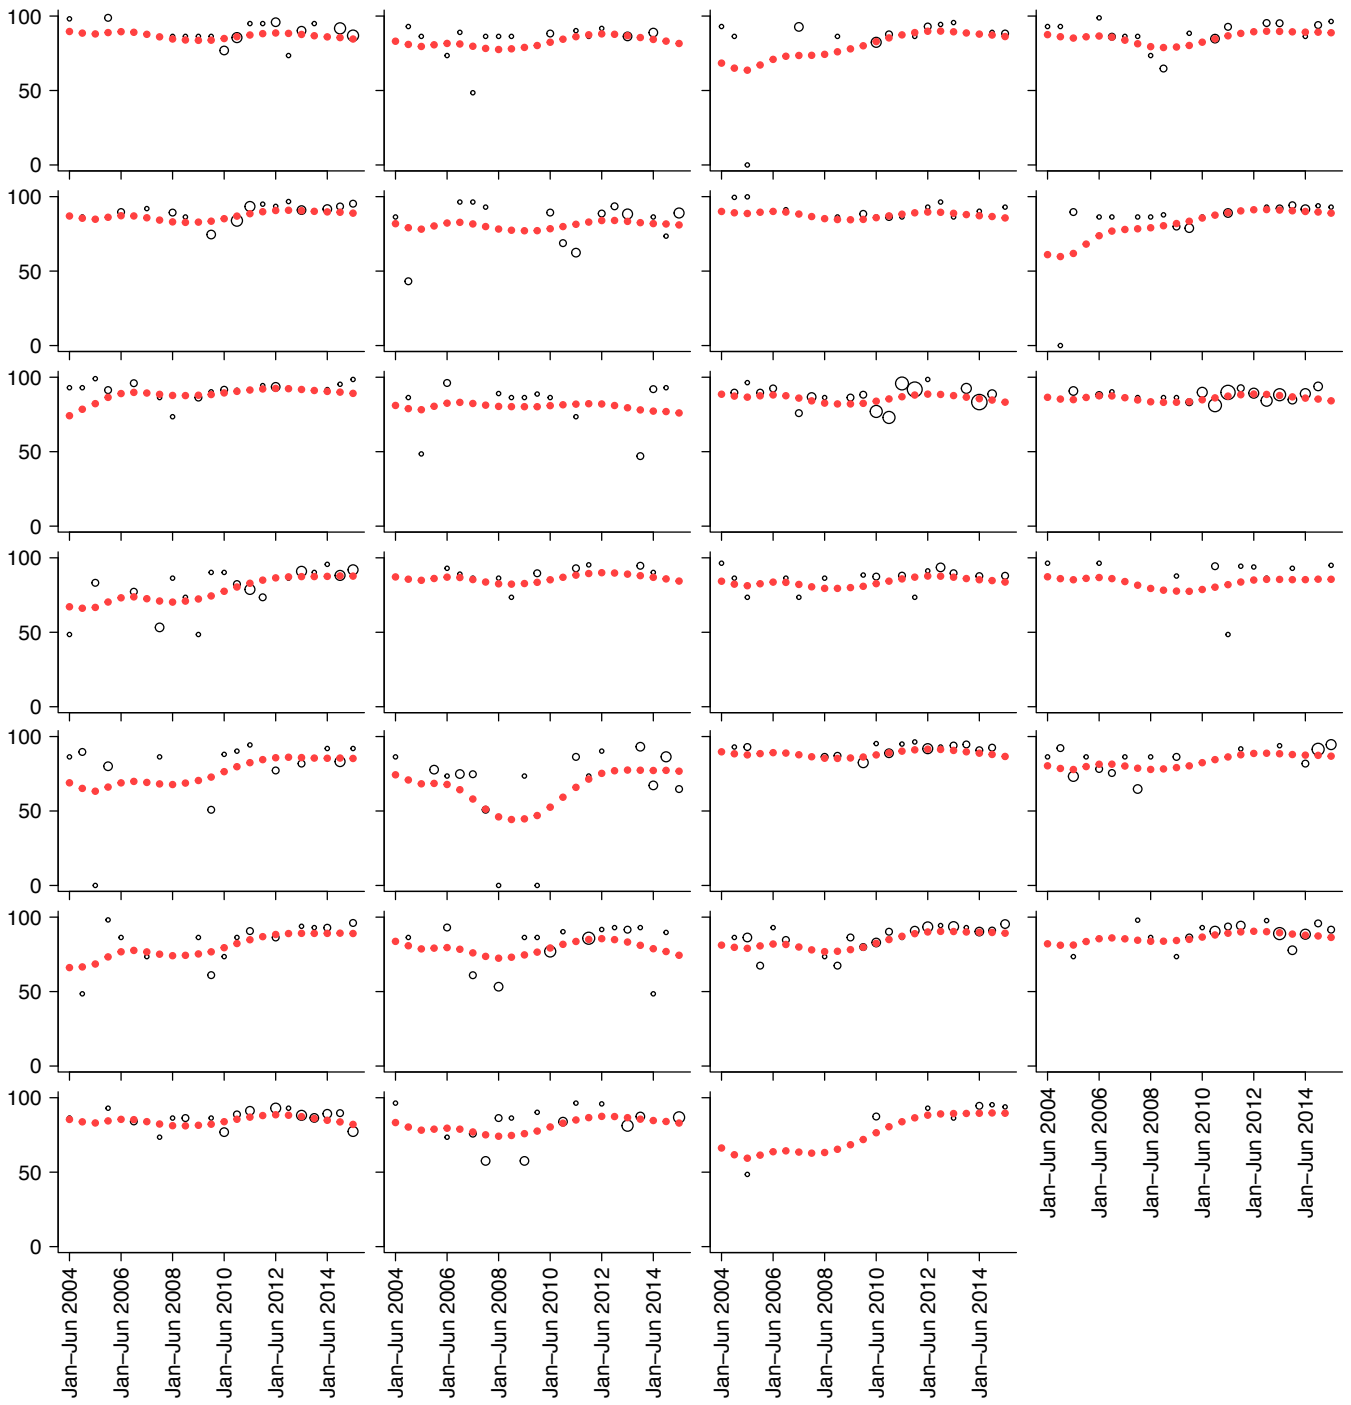

# JIGAWA

Smoothed estimate ●  
Crude estimate, size increases with no. npAFP: ○1 ○10 ○20

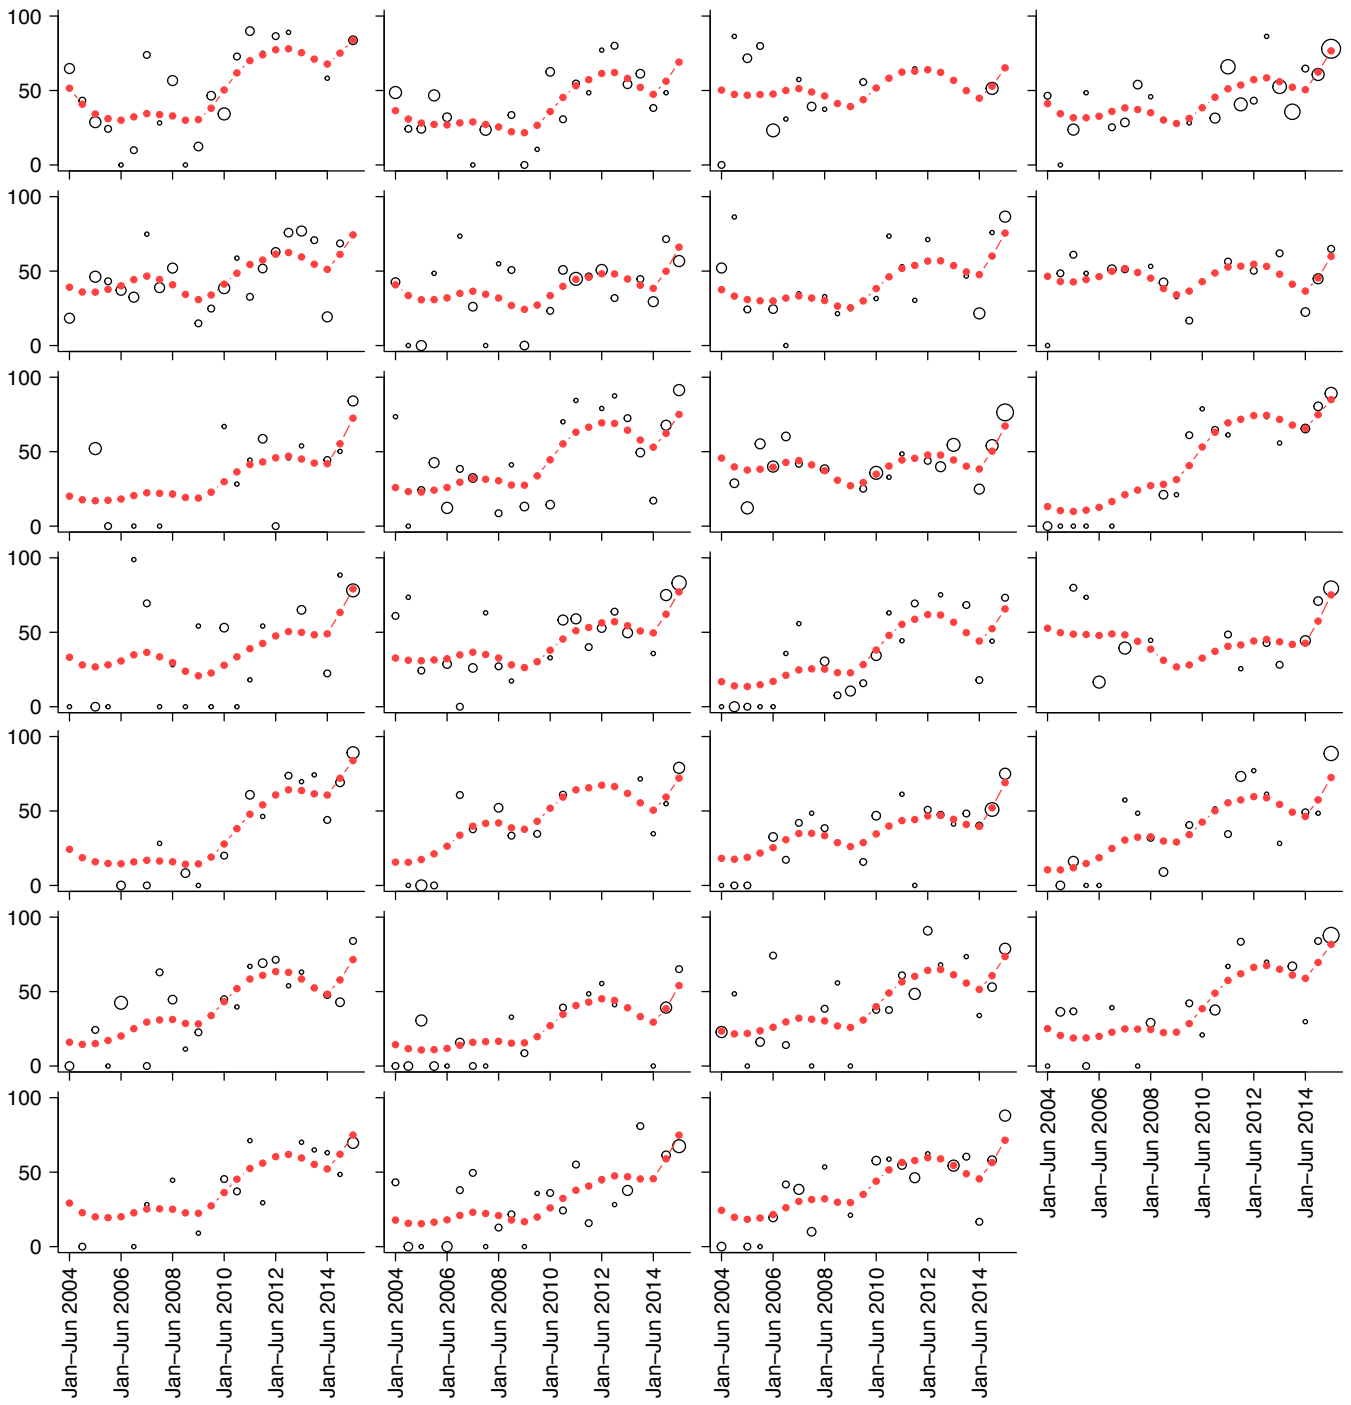

# KADUNA

Smoothed estimate ●  
Crude estimate, size increases with no. npAFP: ○1 ○10 ○20

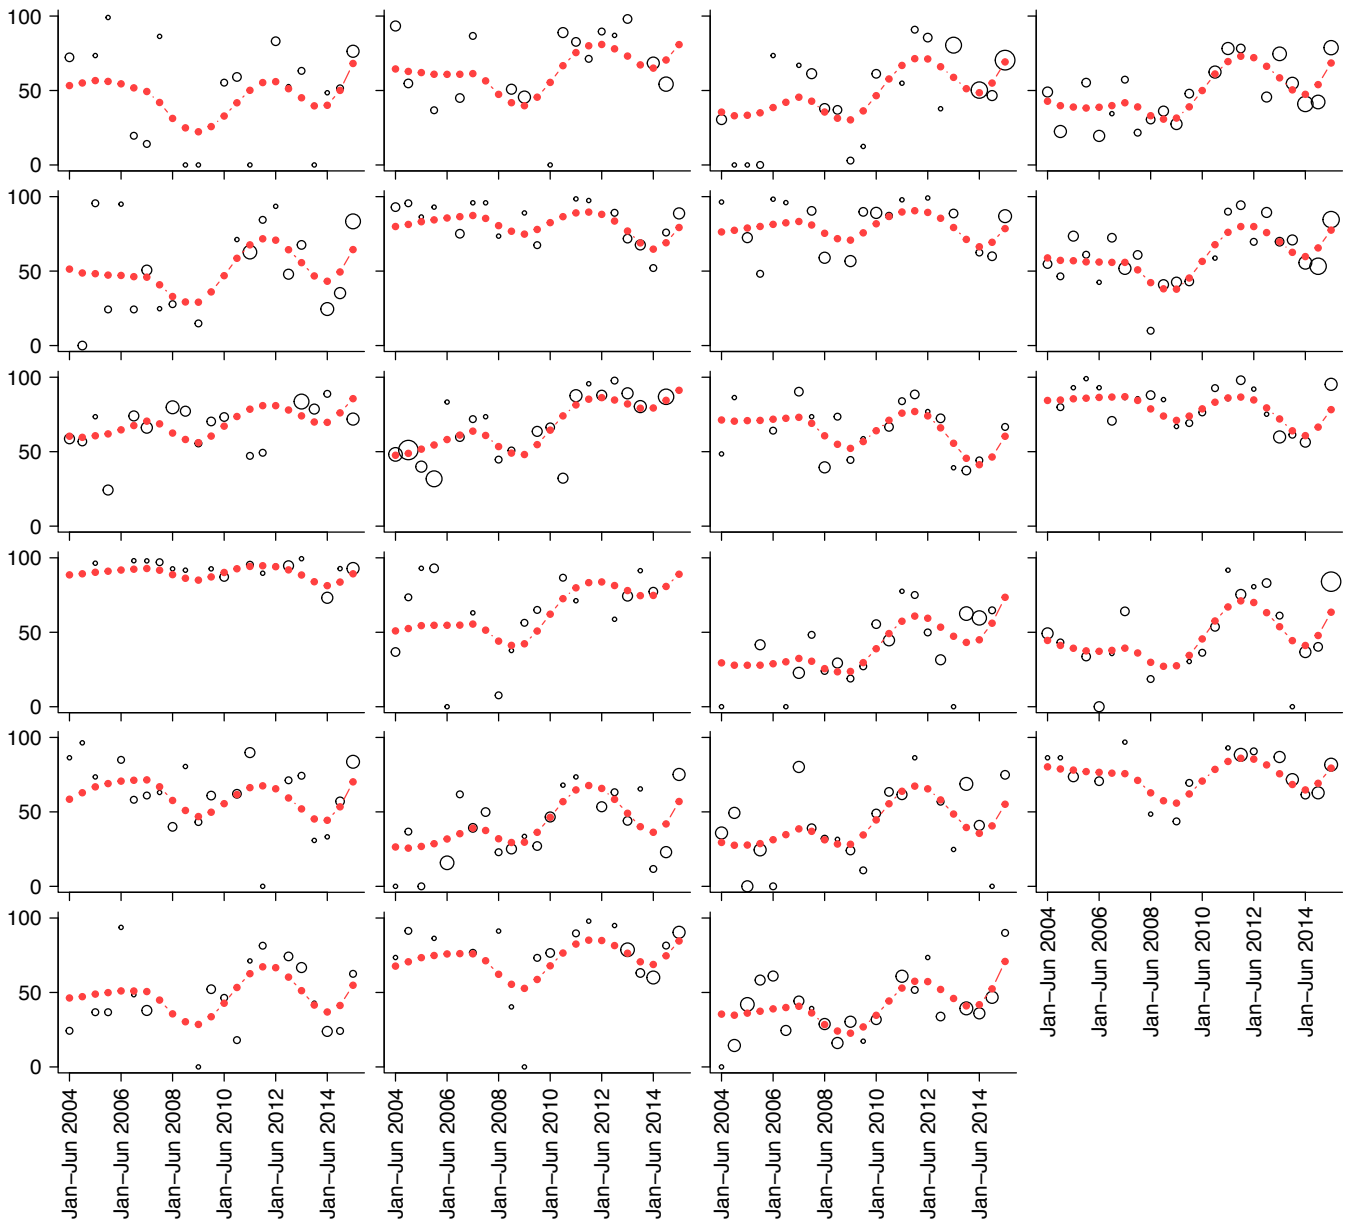



# KANO (1/2)

Smoothed estimate ●  
Crude estimate, size increases with no. npAFP: ○1 ○10 ○20

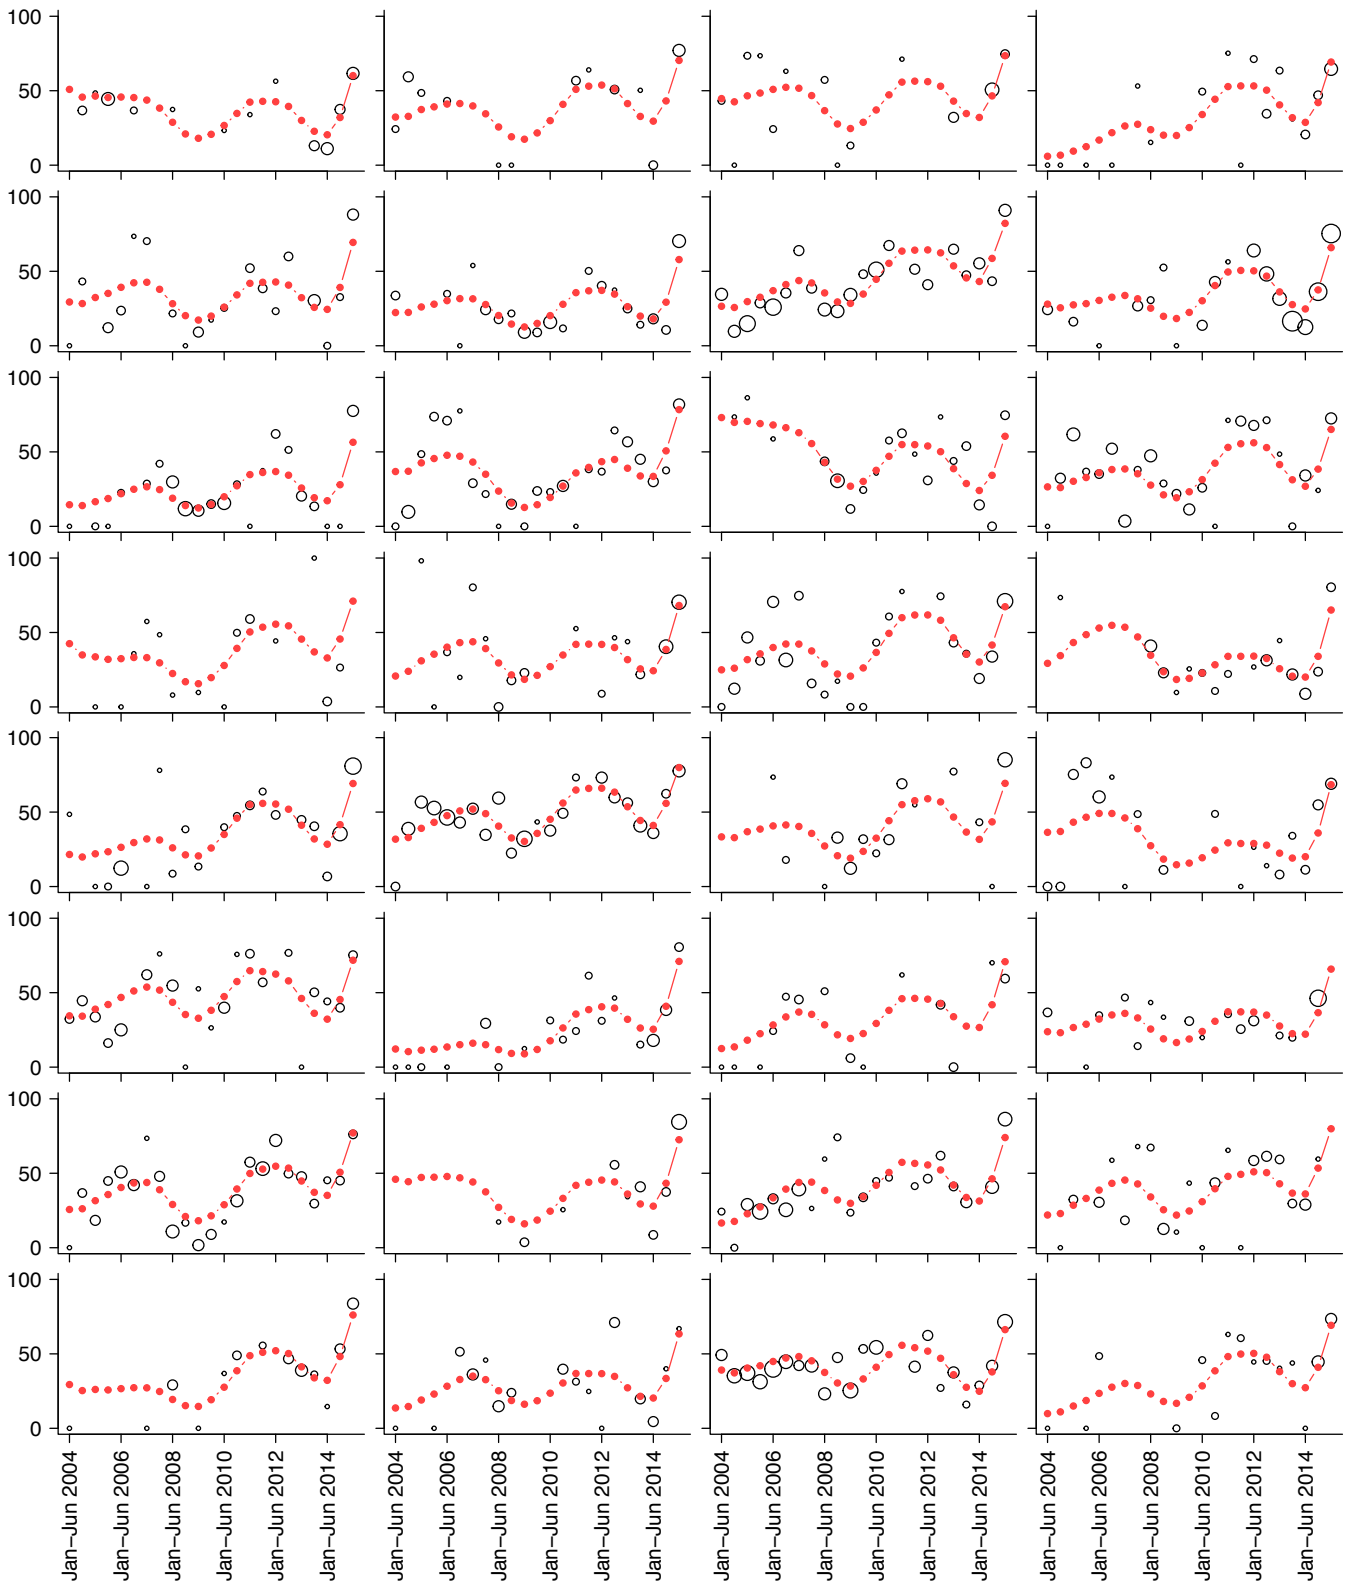

# KANO (2/2)

Smoothed estimate ●  
Crude estimate, size increases with no. npAFP: ○1 ○10 ○20

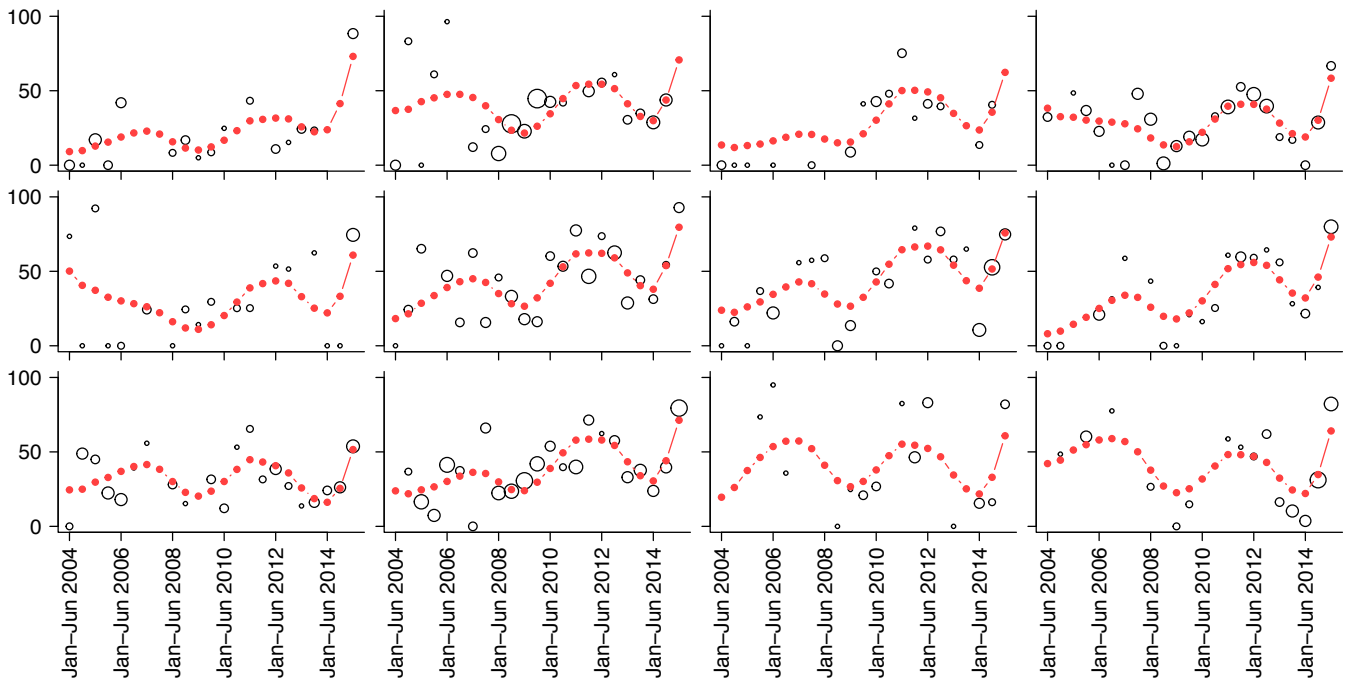

# KATSINA

Smoothed estimate ●  
 Crude estimate, size increases with no. npAFP: ○1 ○10 ○20

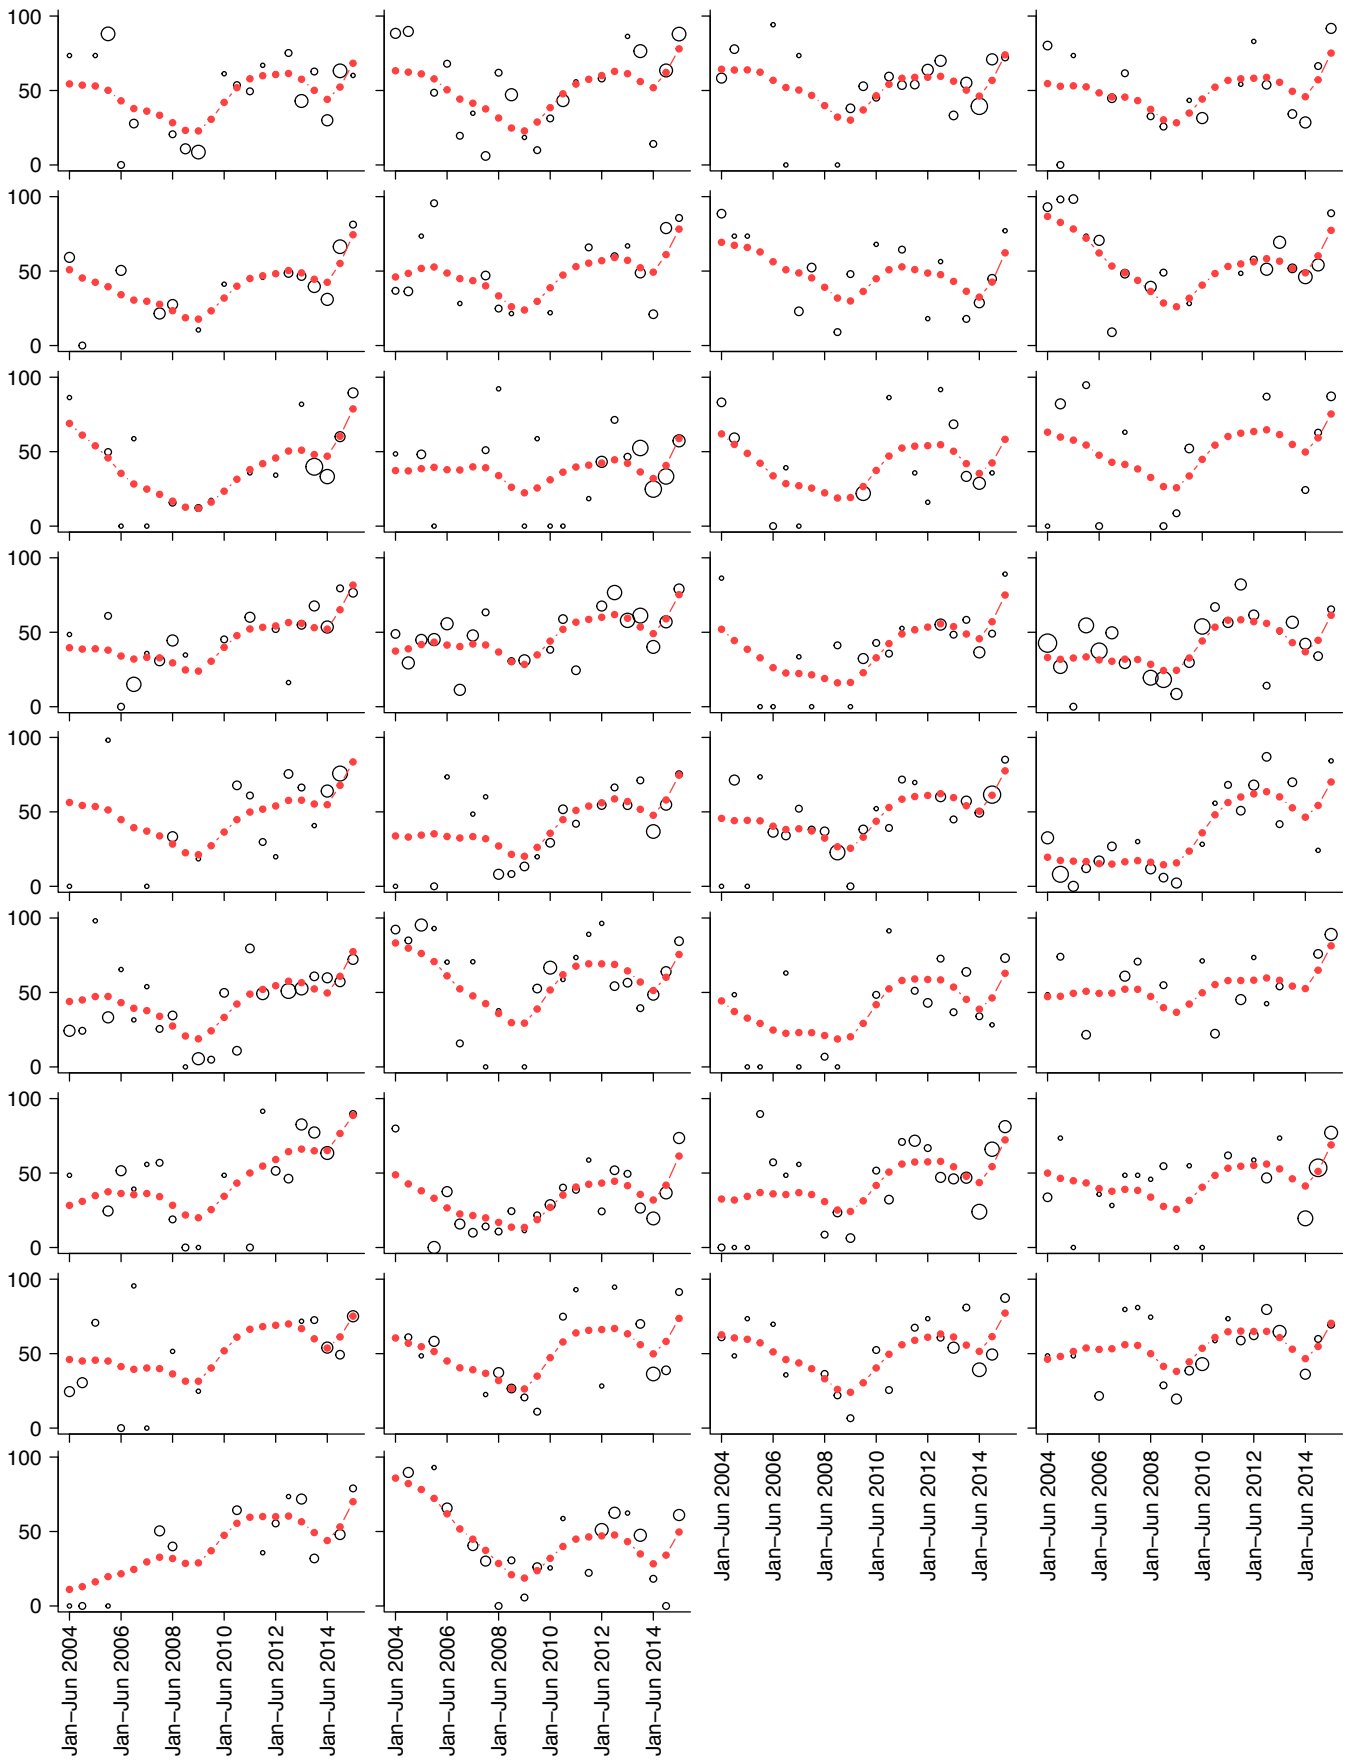

# KEBBI

Smoothed estimate ●  
Crude estimate, size increases with no. npAFP: ○1 ○10 ○20

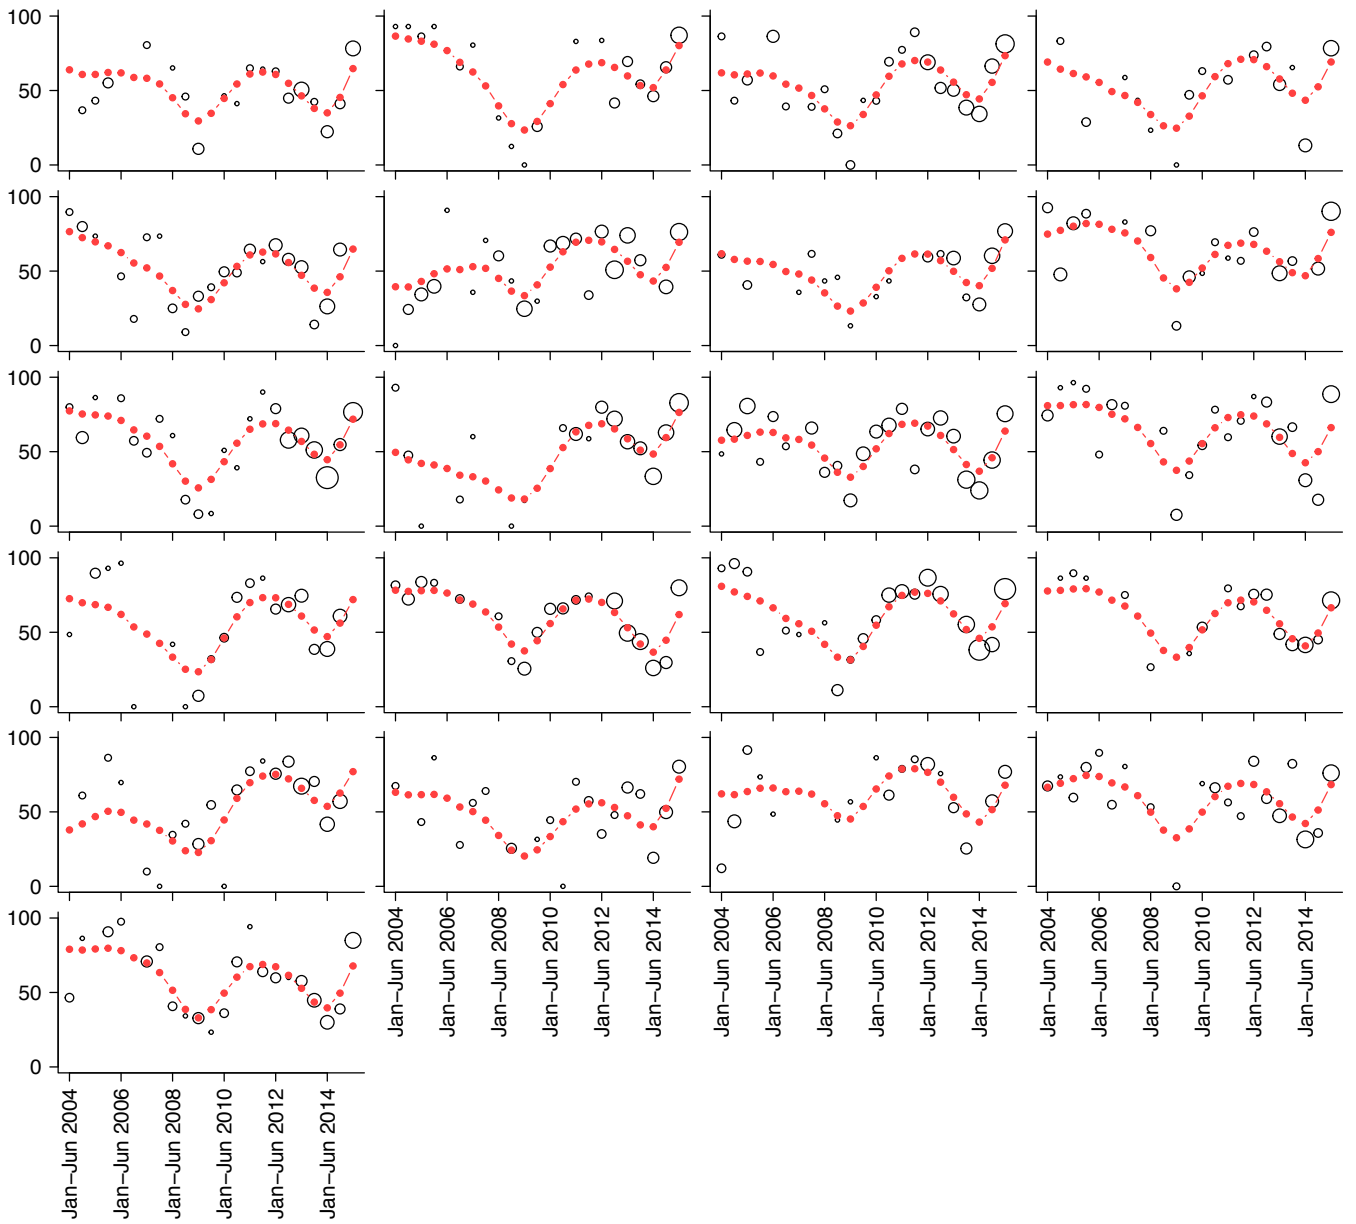

# KOGI

Smoothed estimate ●  
Crude estimate, size increases with no. npAFP: ○1 ○10 ○20

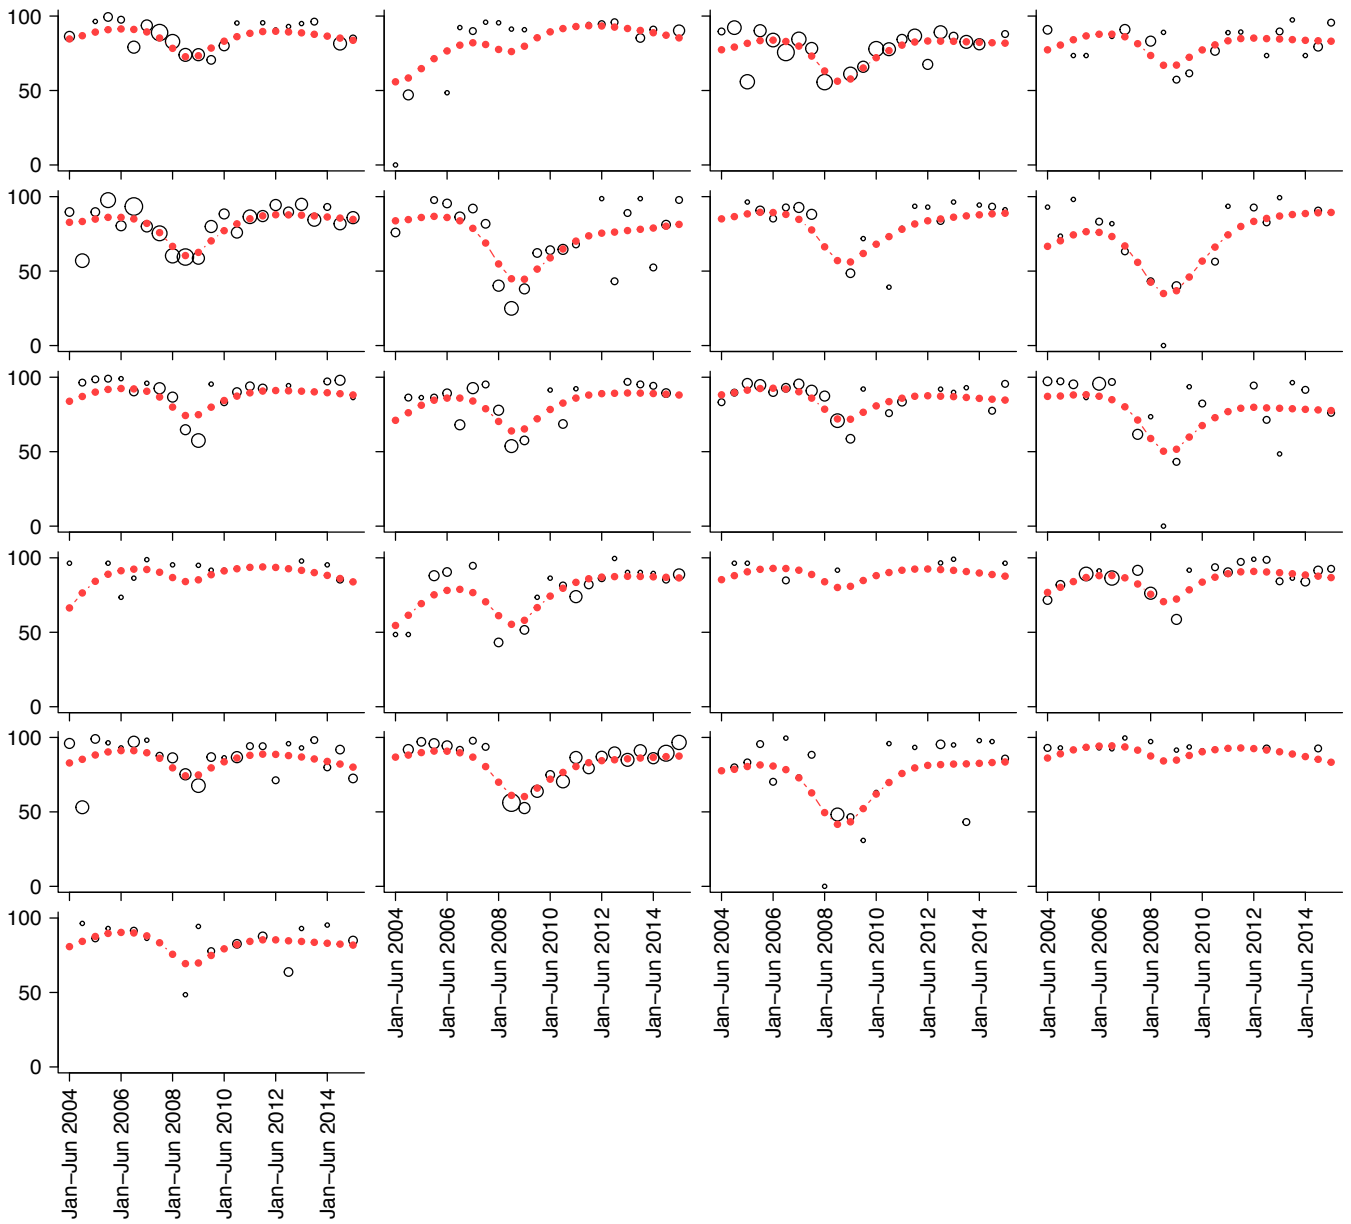

# KWARA

Smoothed estimate ●  
Crude estimate, size increases with no. npAFP: ○1 ○10 ○20

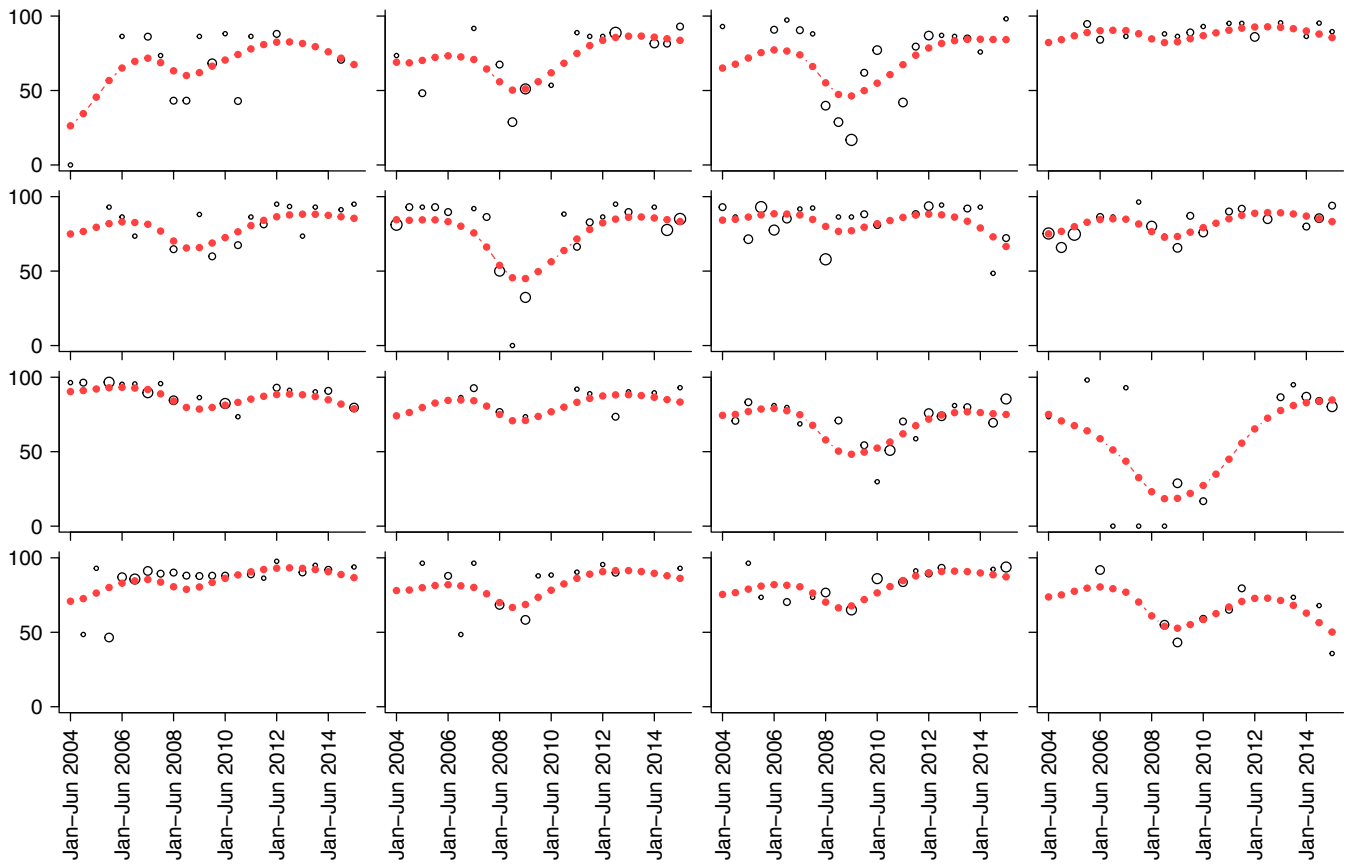

# LAGOS

Smoothed estimate ●  
Crude estimate, size increases with no. npAFP: ○1 ○10 ○20

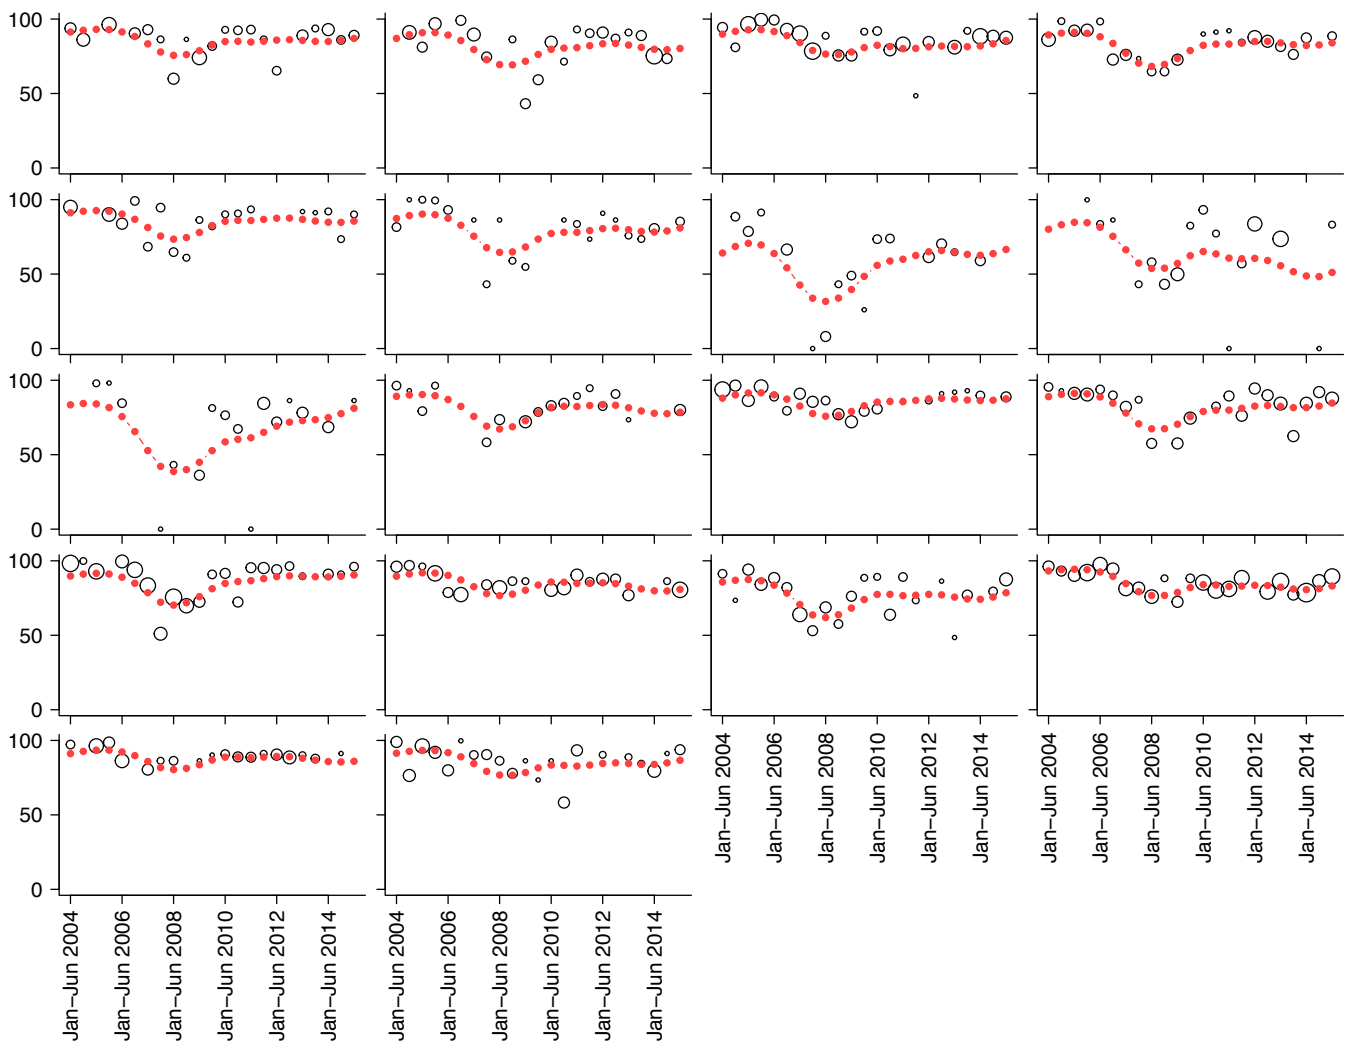

# NASARAWA

Smoothed estimate ●  
Crude estimate, size increases with no. npAFP: ○1 ○10 ○20

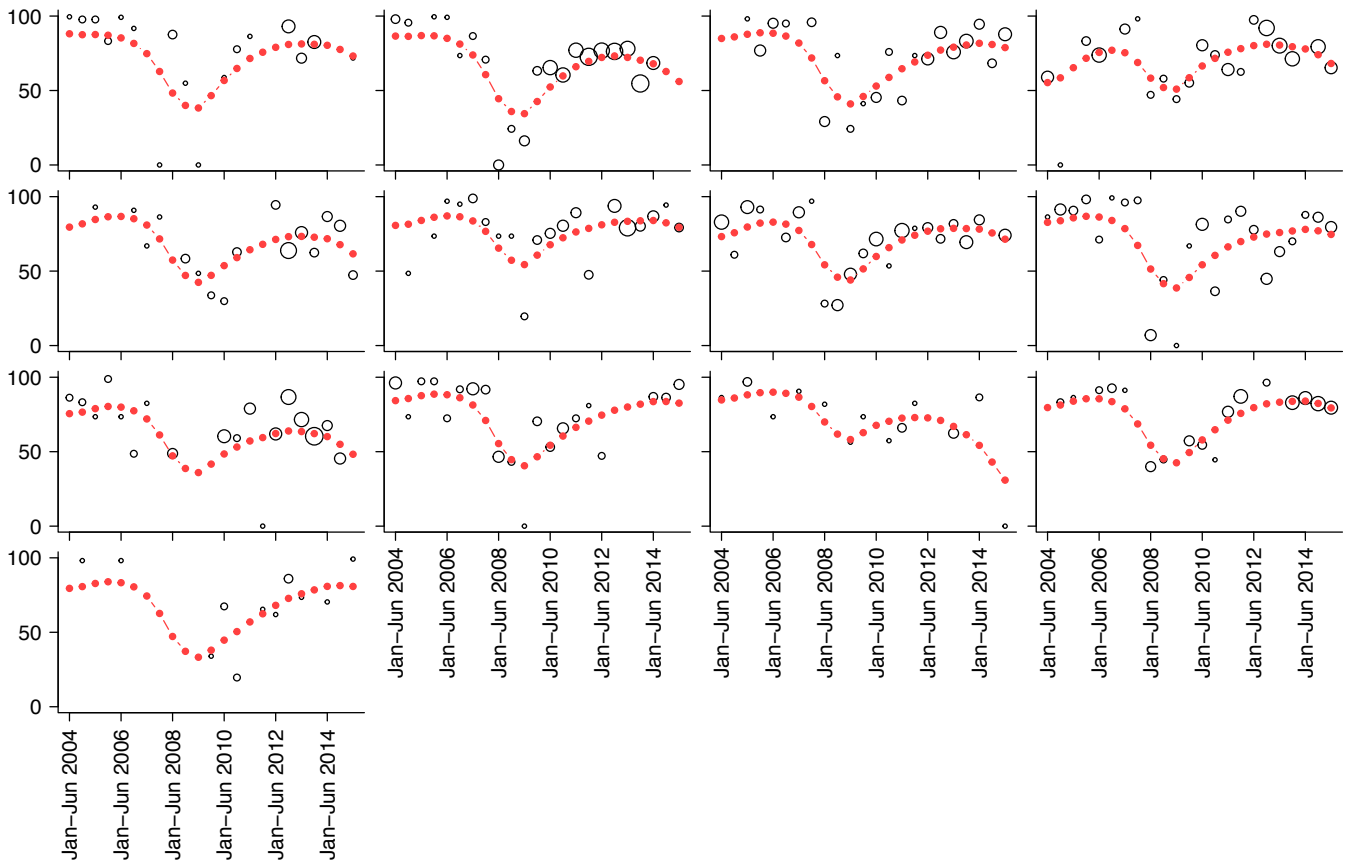



# NIGER

Smoothed estimate ●  
Crude estimate, size increases with no. npAFP: ○1 ○10 ○20

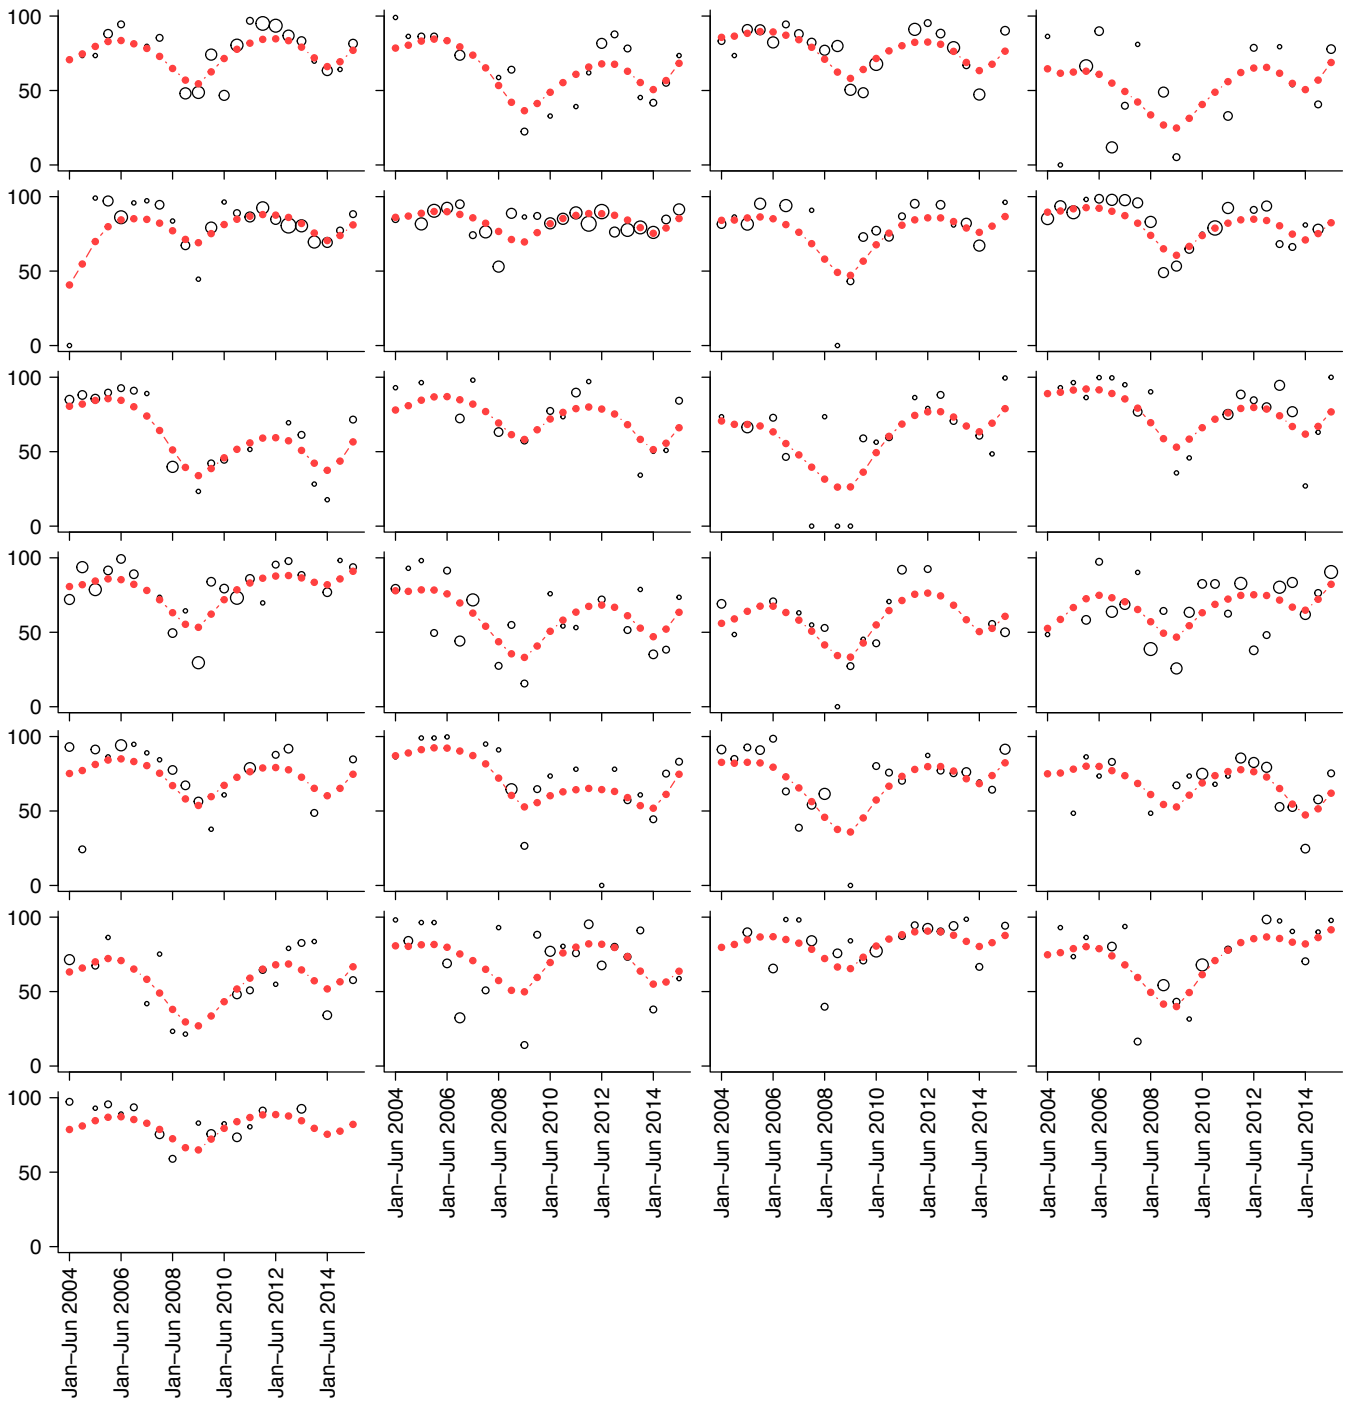

# OGUN

Smoothed estimate ●  
Crude estimate, size increases with no. npAFP: ○1 ○10 ○20

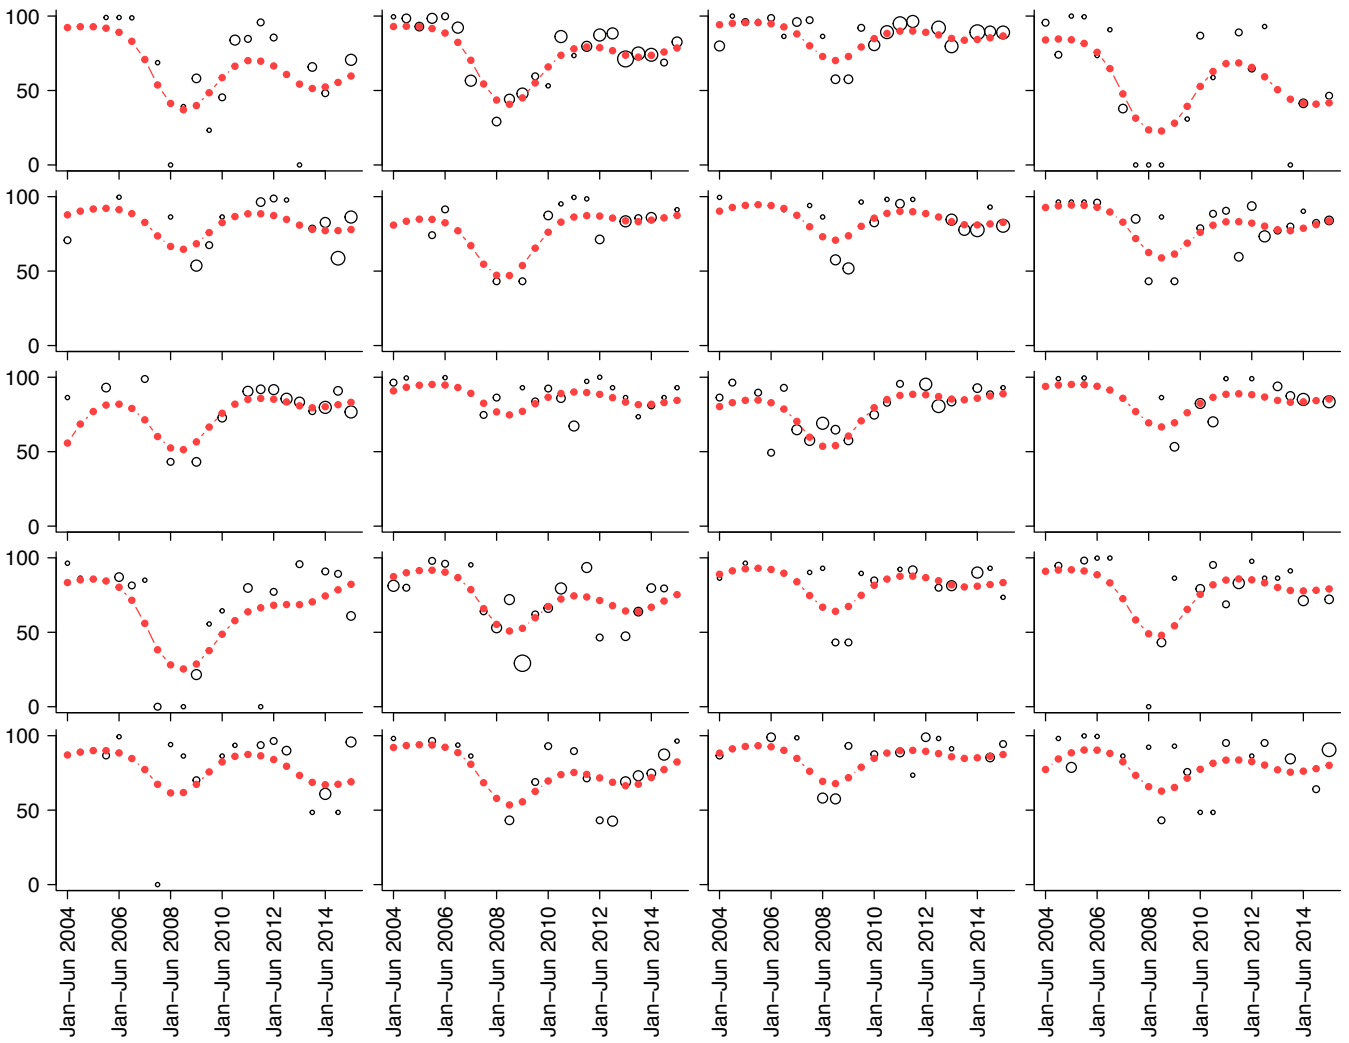

# ONDO

Smoothed estimate ●  
Crude estimate, size increases with no. npAFP: ○1 ○10 ○20

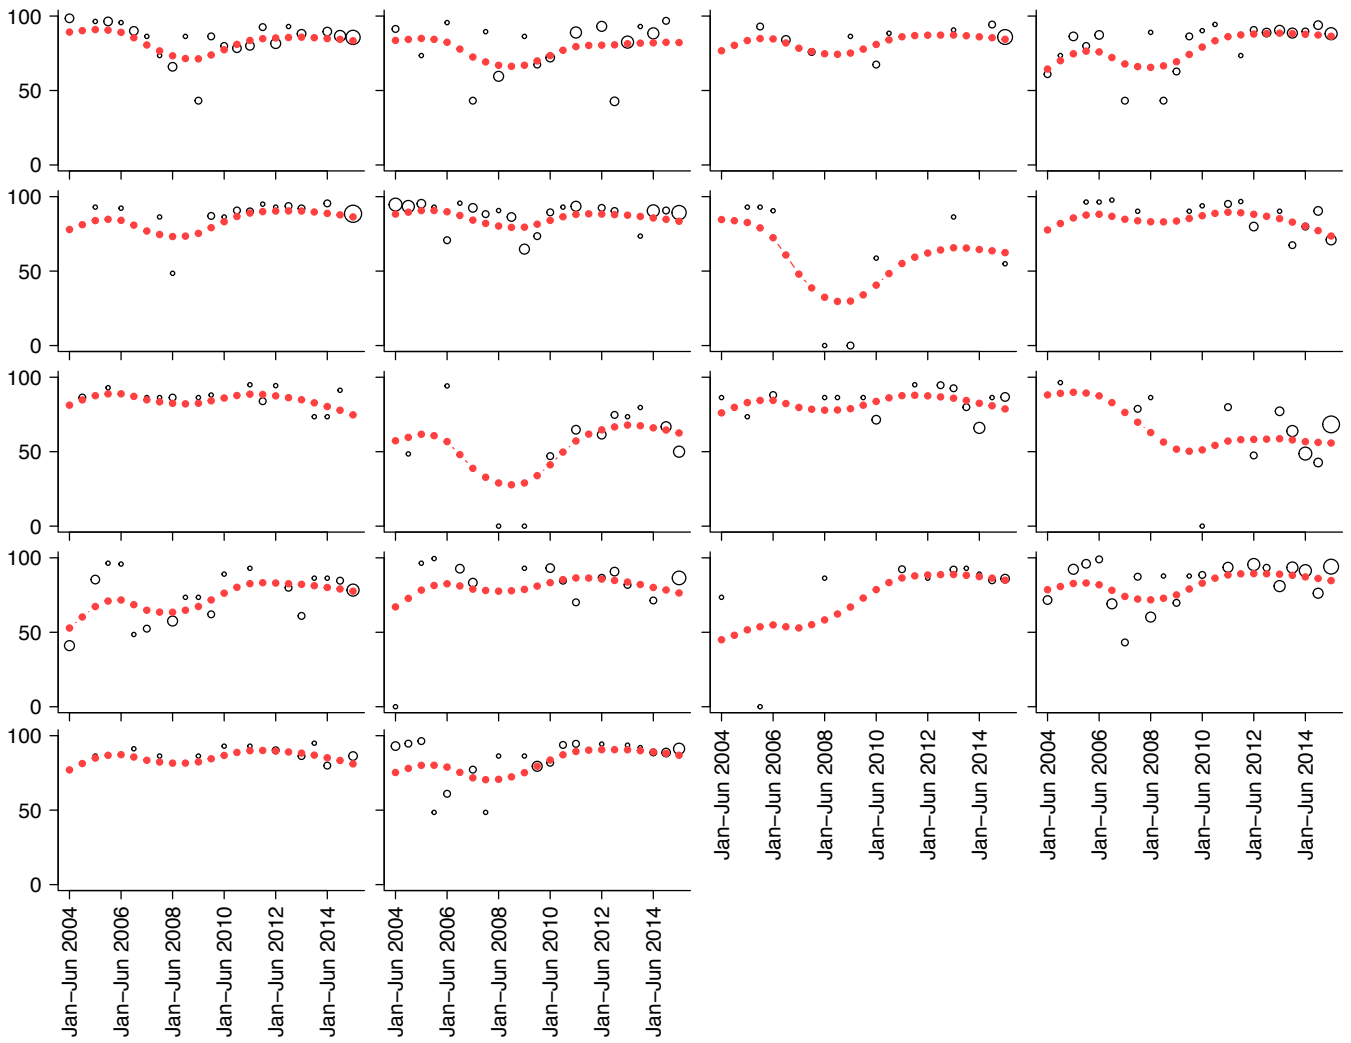

# OSUN

Smoothed estimate ●  
Crude estimate, size increases with no. npAFP: ○1 ○10 ○20

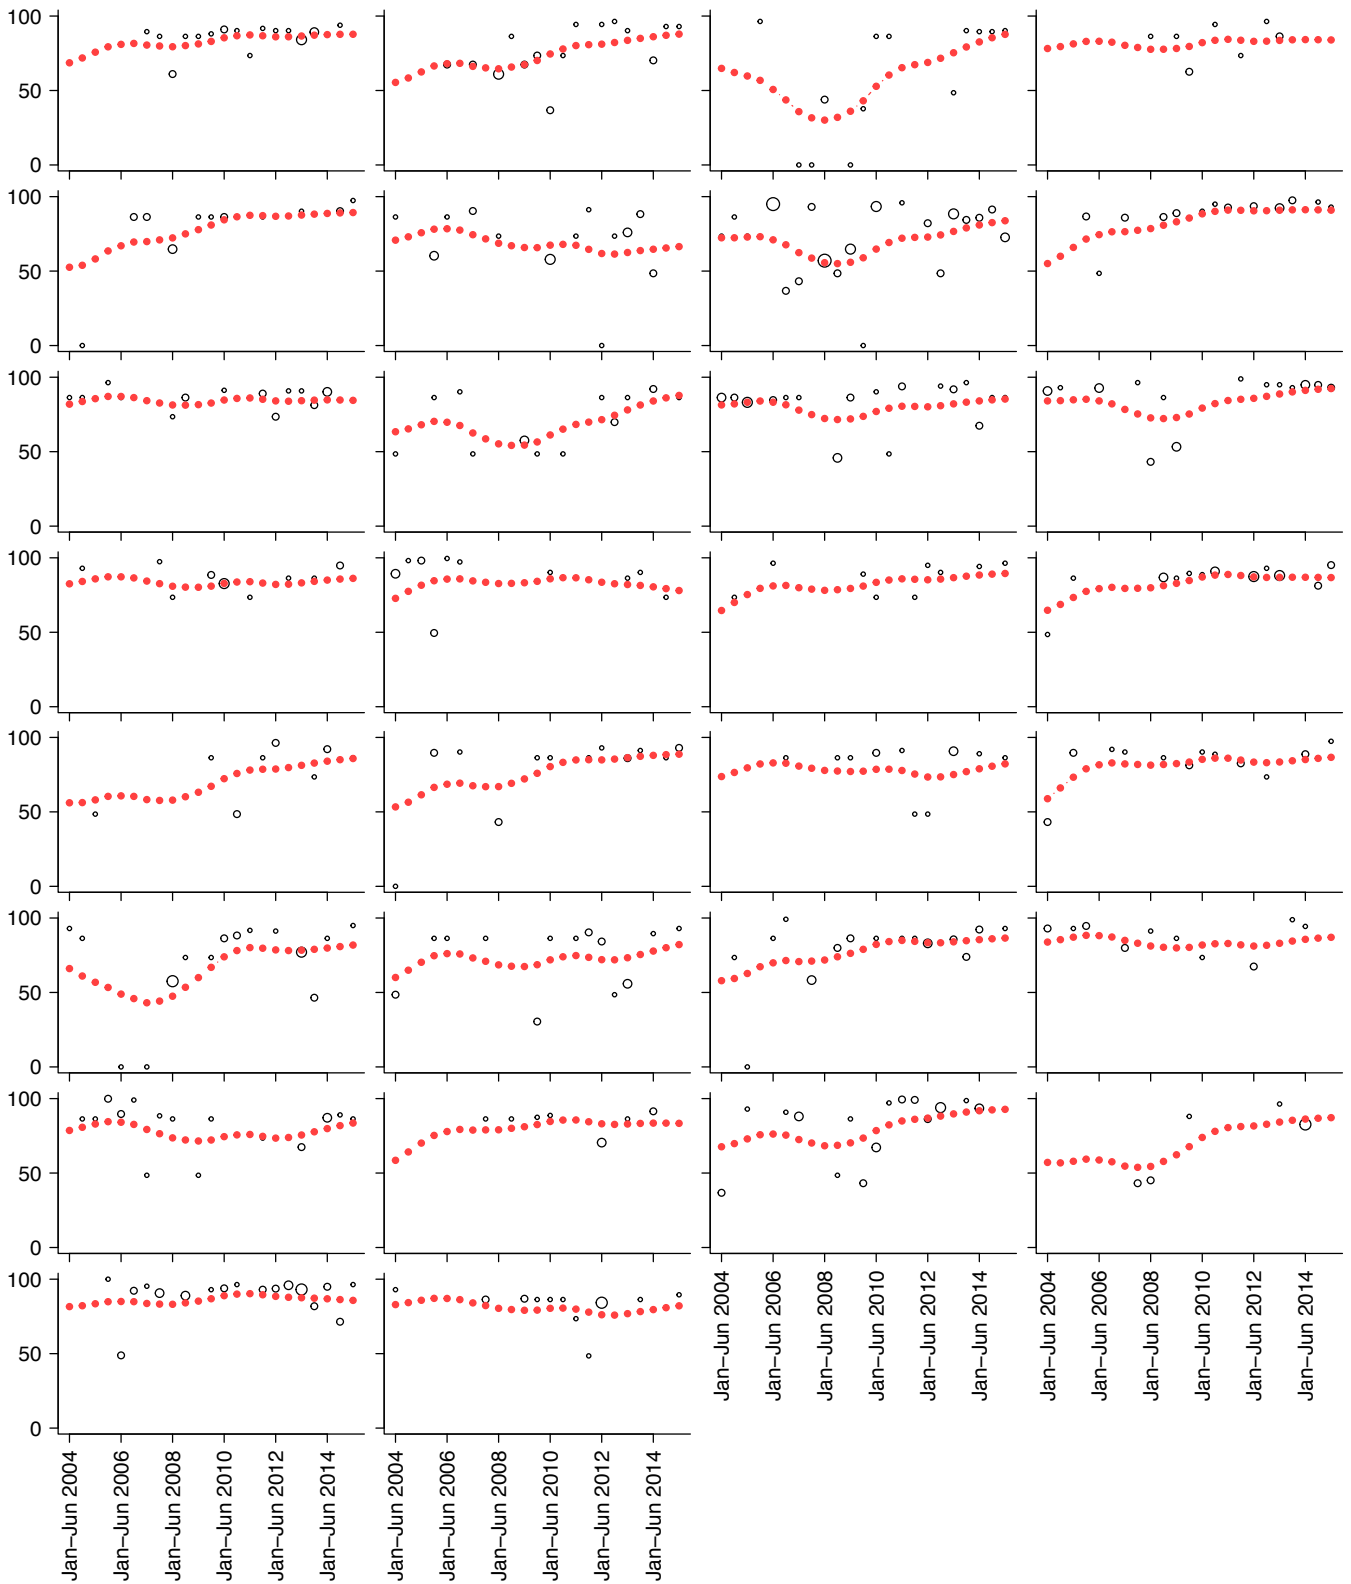

# OYO

Smoothed estimate ●  
Crude estimate, size increases with no. npAFP: ○1 ○10 ○20

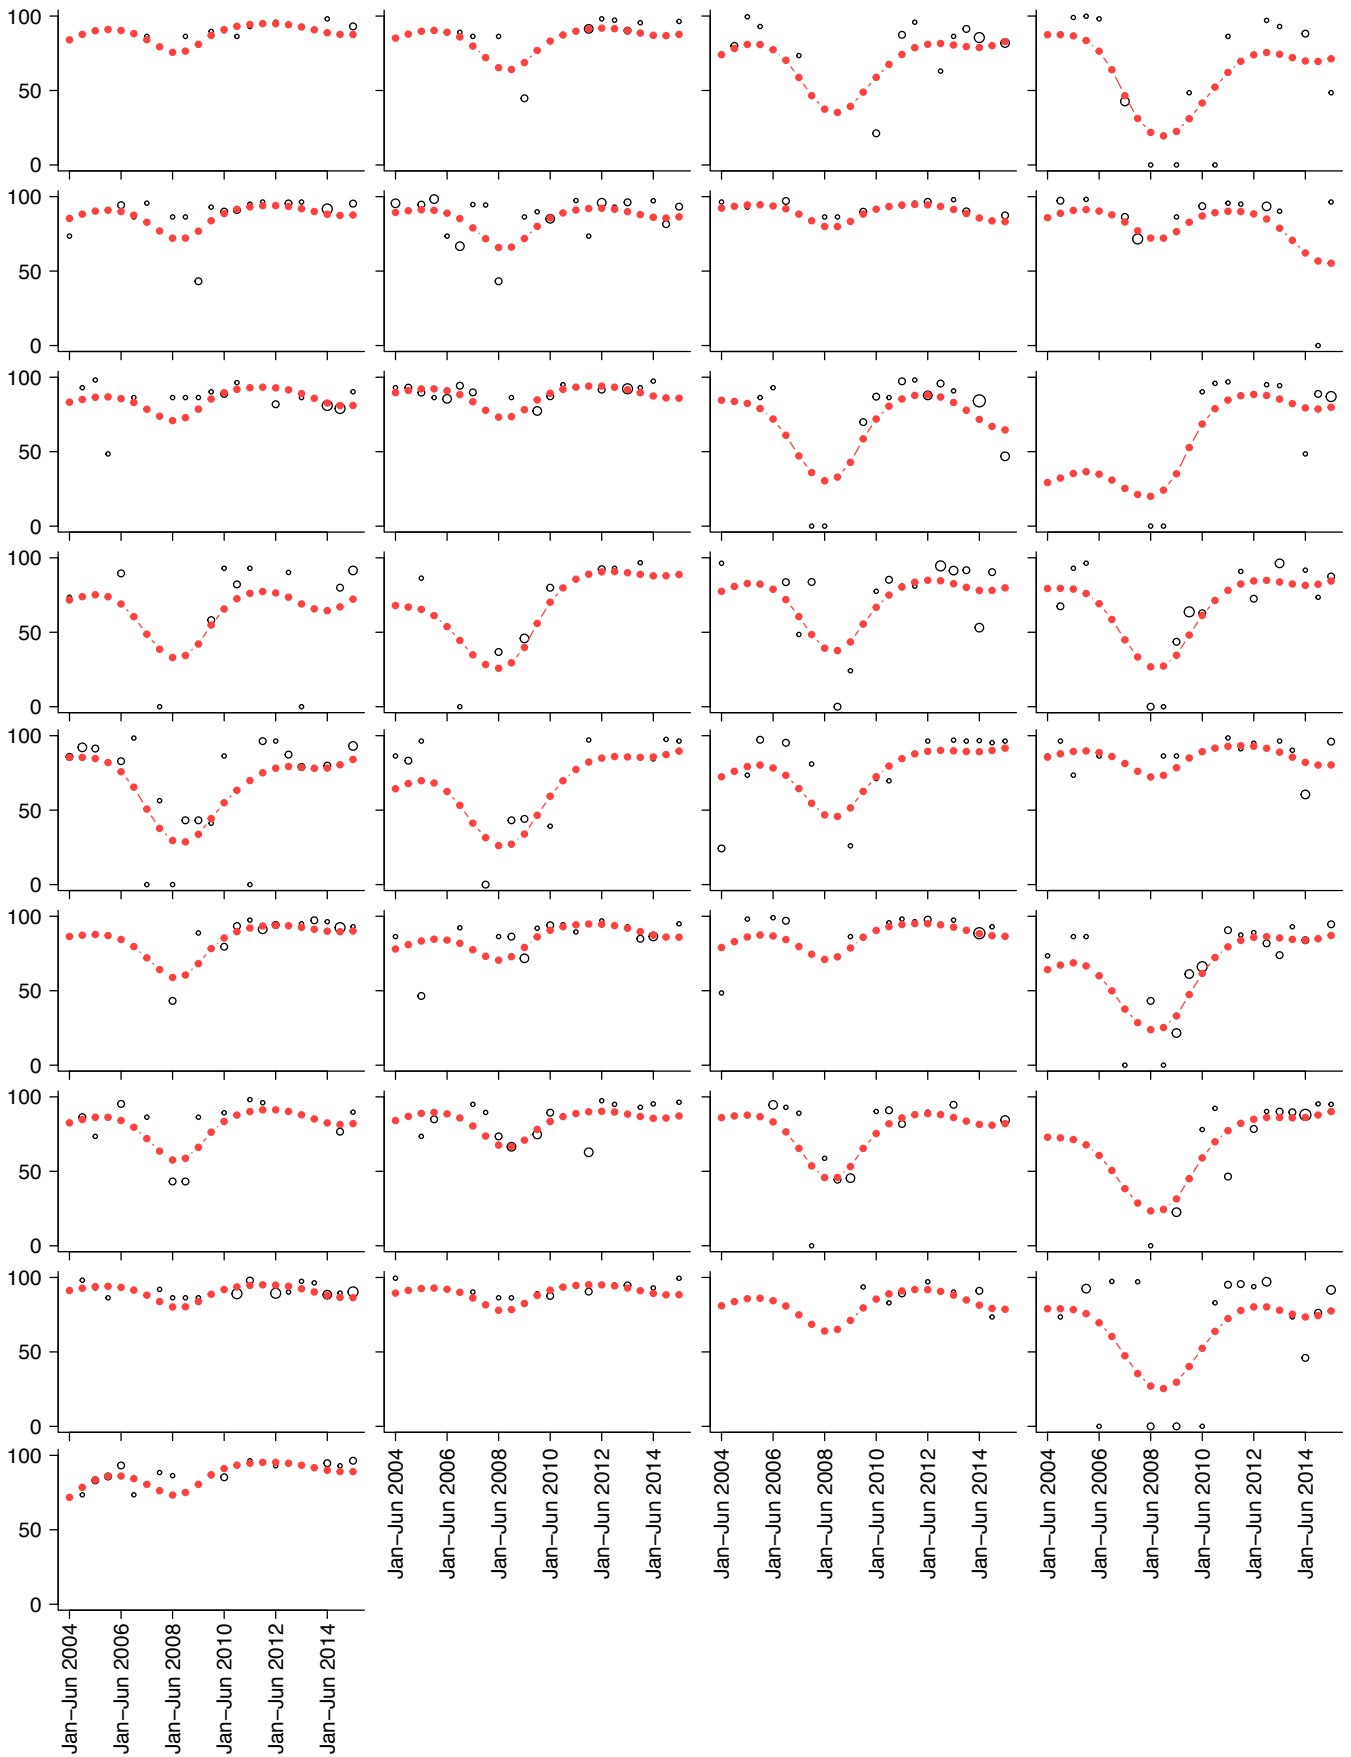

# PLATEAU

Smoothed estimate ●  
Crude estimate, size increases with no. npAFP: ○1 ○10 ○20

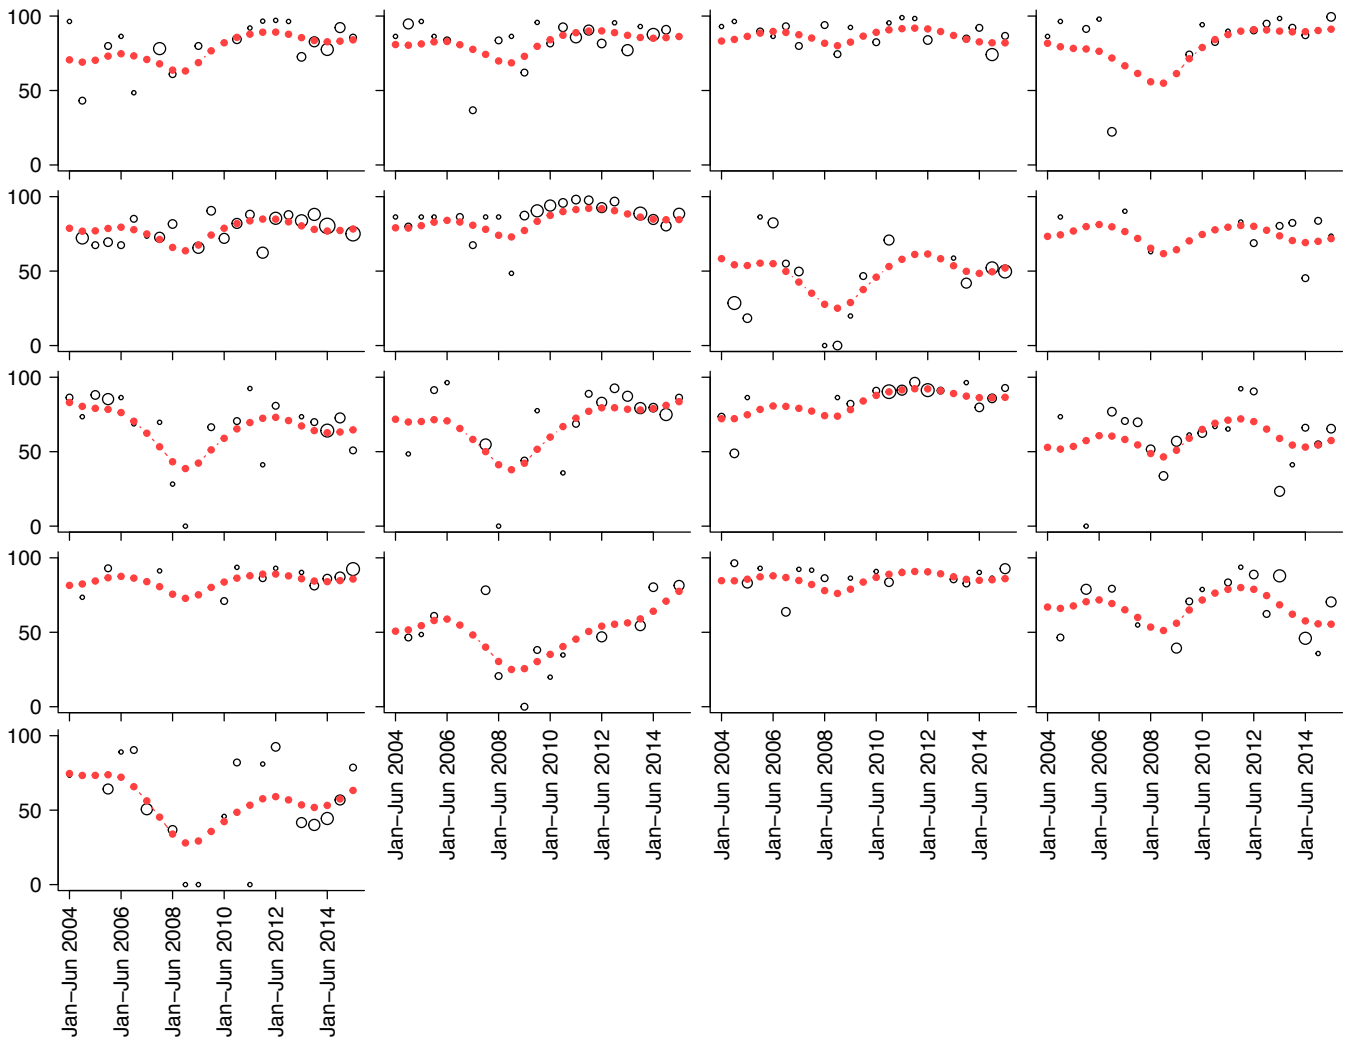

# RIVERS

Smoothed estimate ●  
Crude estimate, size increases with no. npAFP: ○10 ○20

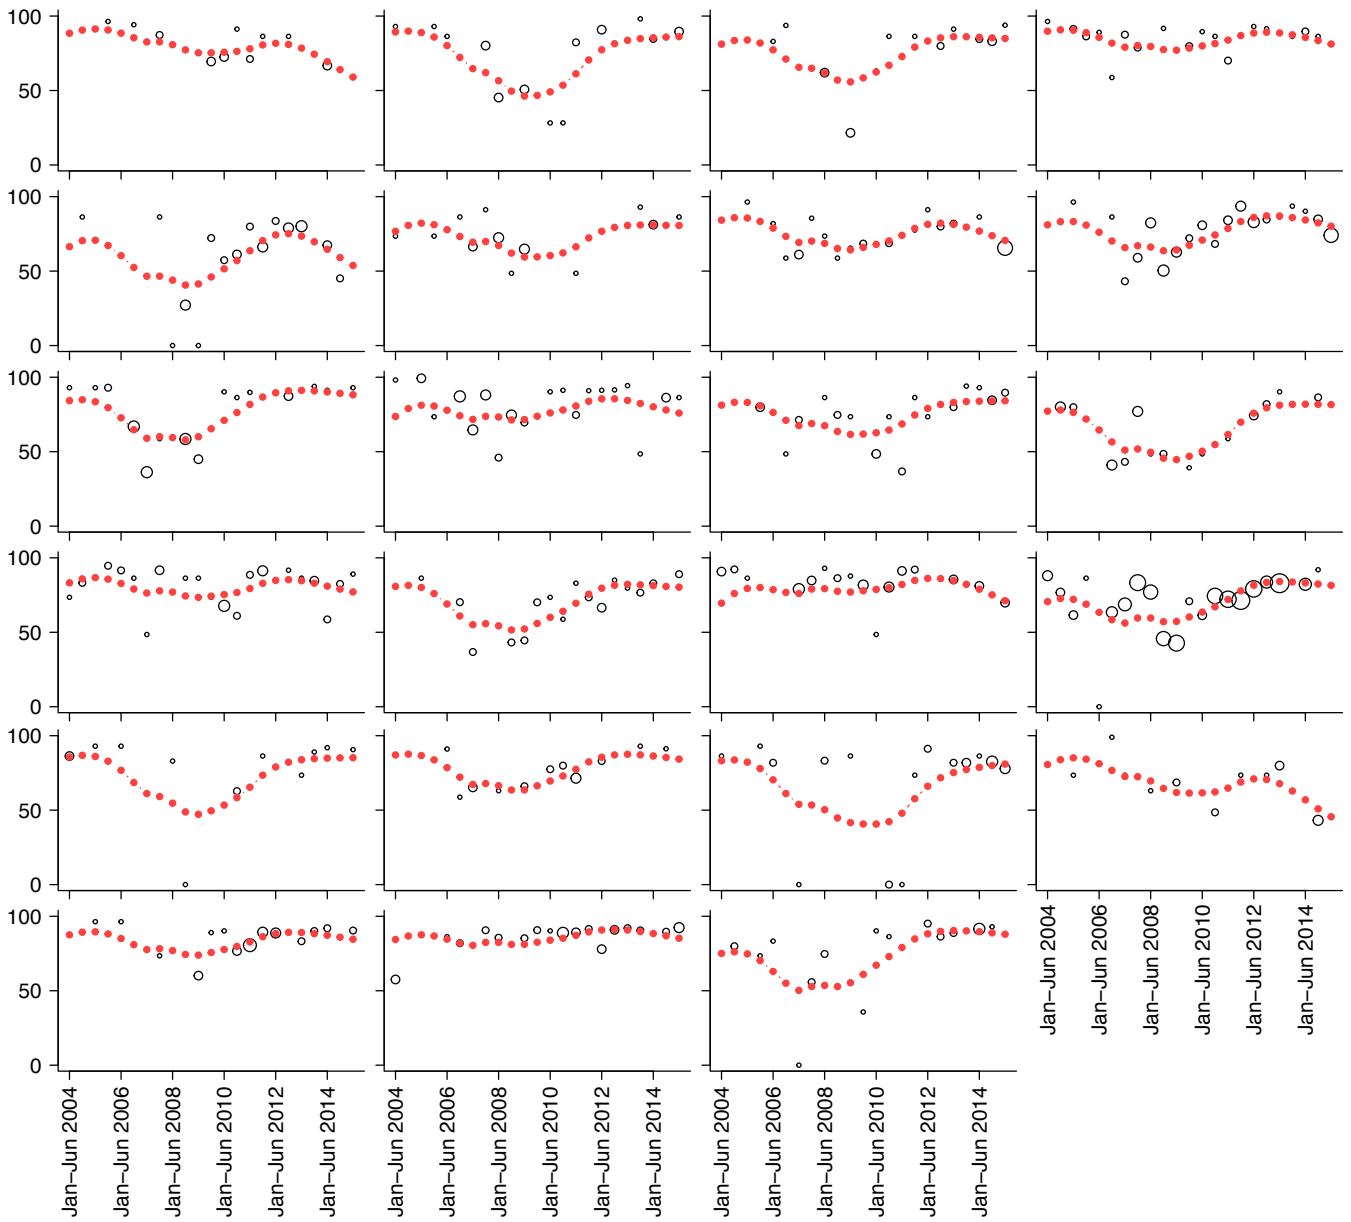

# SOKOTO

Smoothed estimate ●  
Crude estimate, size increases with no. npAFP: ○1 ○10 ○20

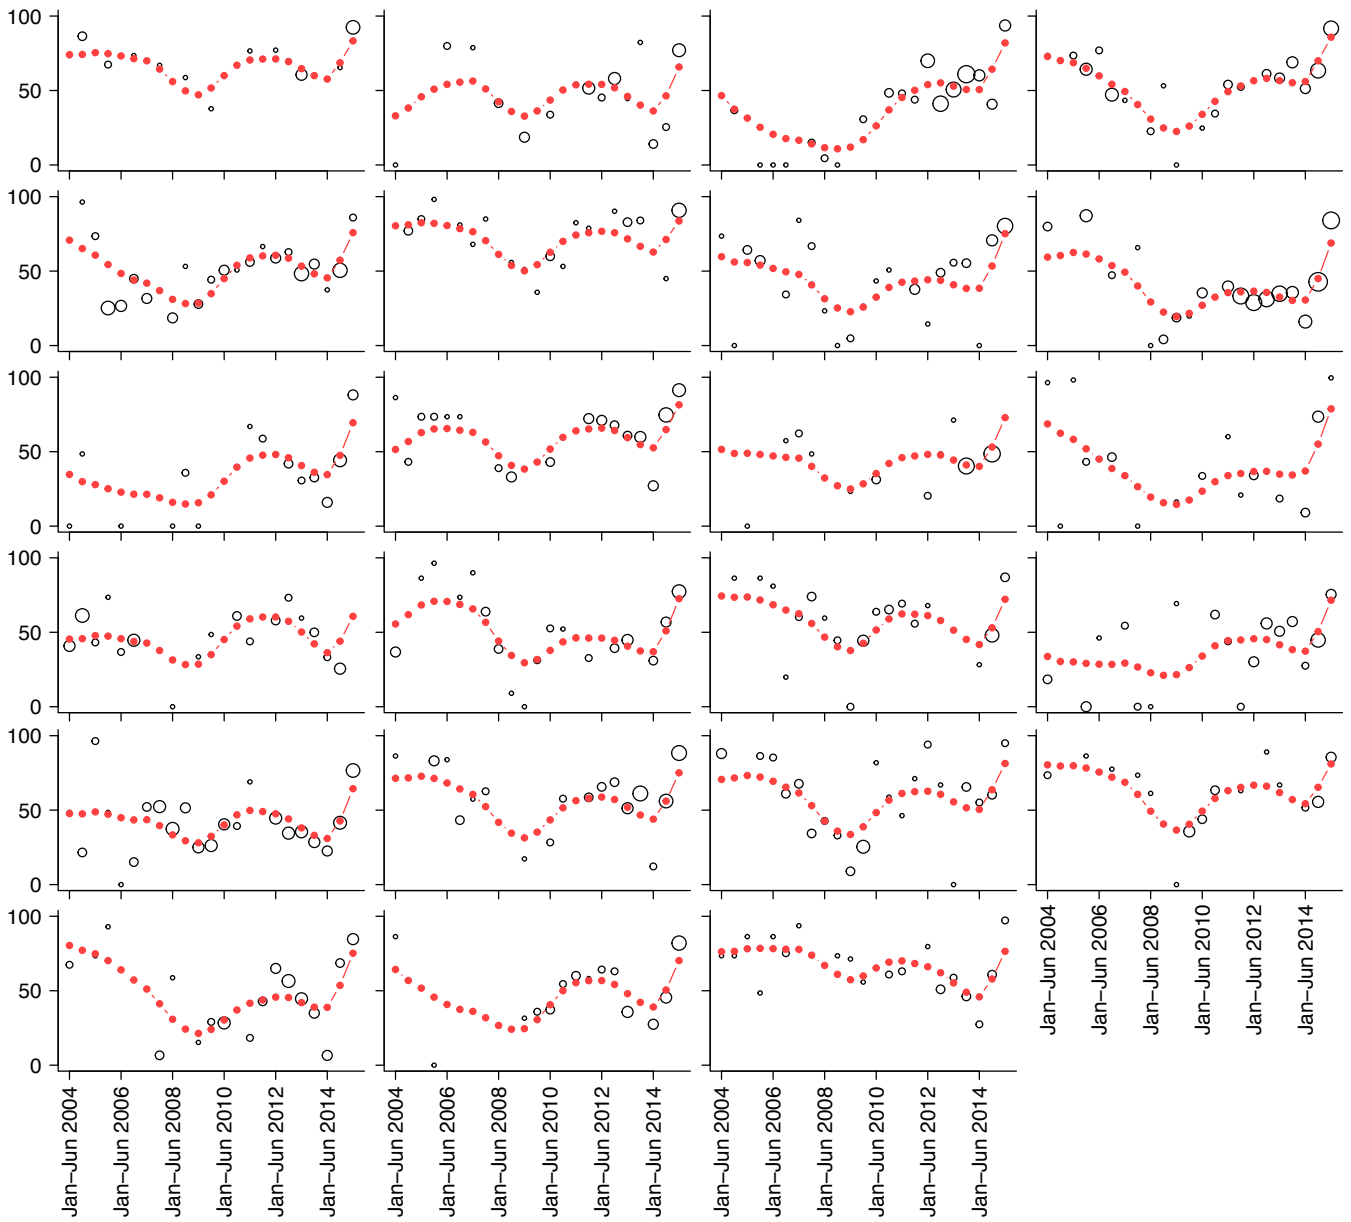



# TARABA

Smoothed estimate ●  
Crude estimate, size increases with no. npAFP: ○1 ○10 ○20

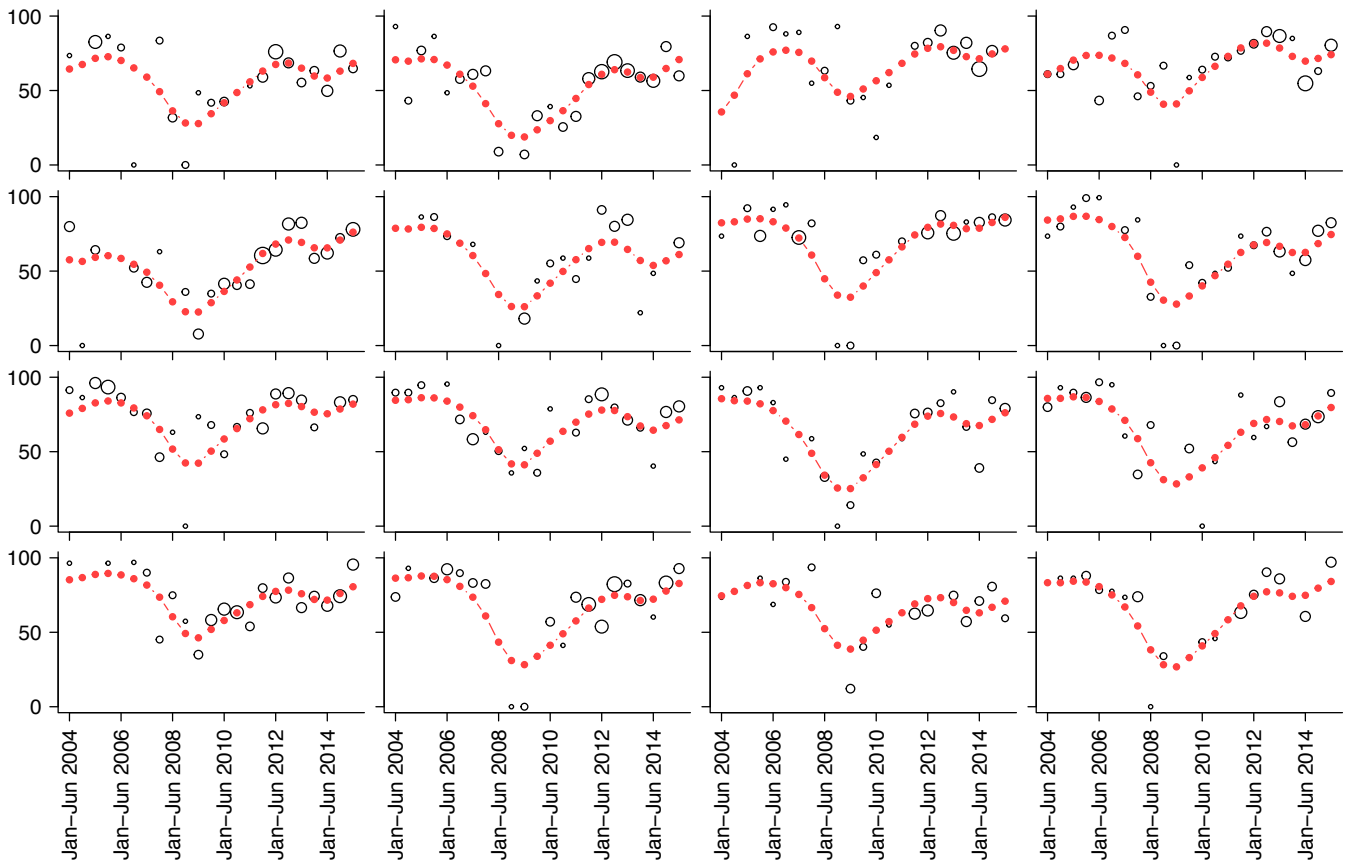

# YOBE

Smoothed estimate ●  
Crude estimate, size increases with no. npAFP: ○1 ○10 ○20

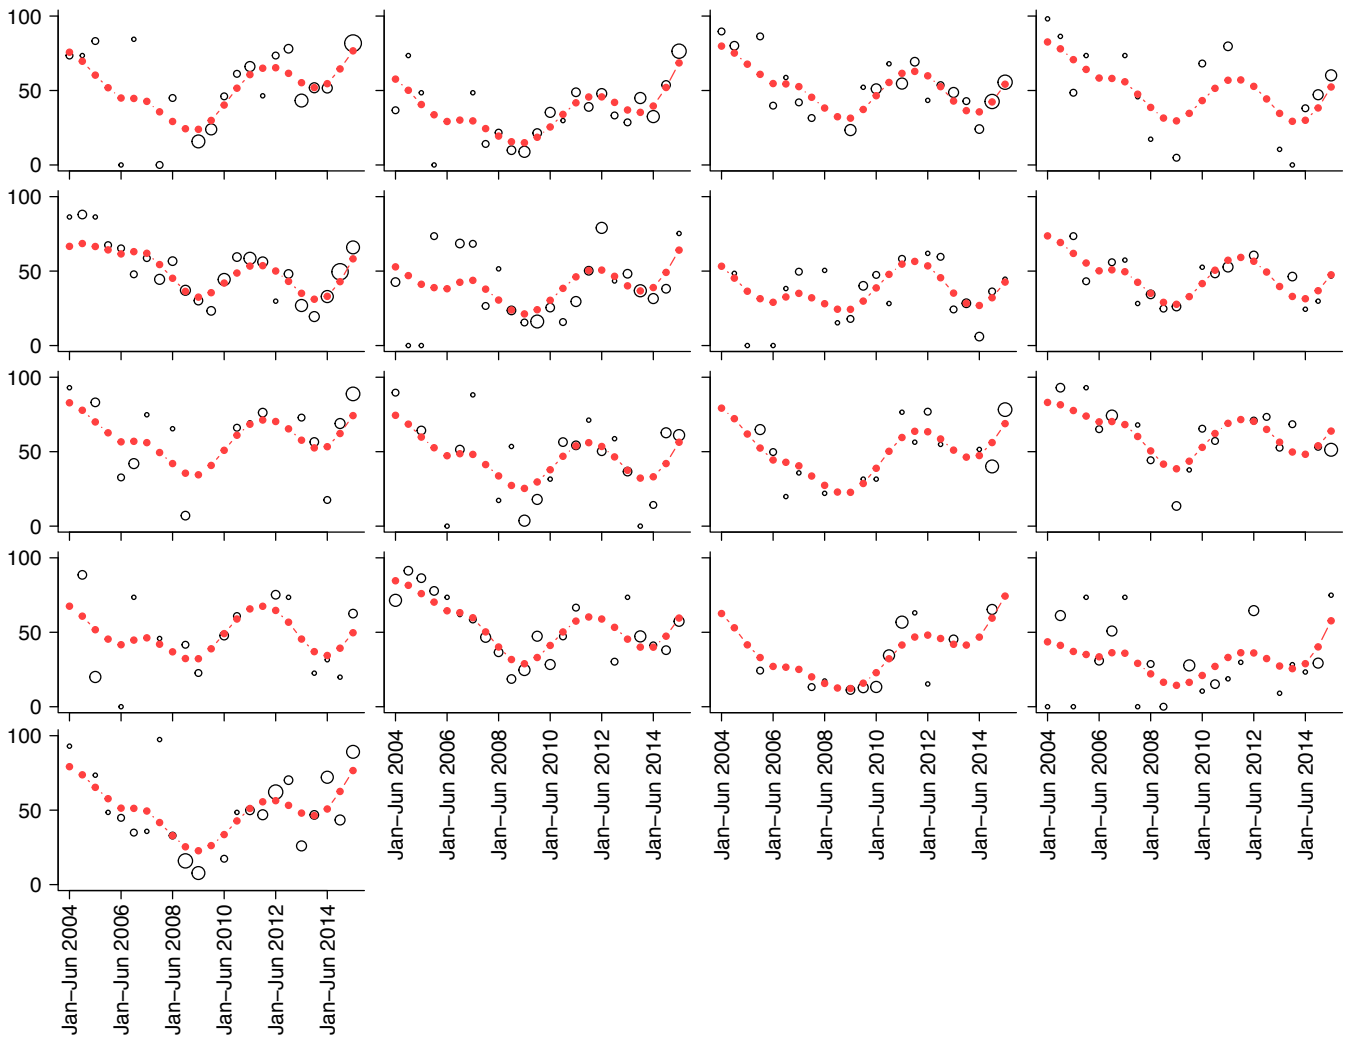

# ZAMFARA

Smoothed estimate ●  
Crude estimate, size increases with no. npAFP: ○1 ○10 ○20

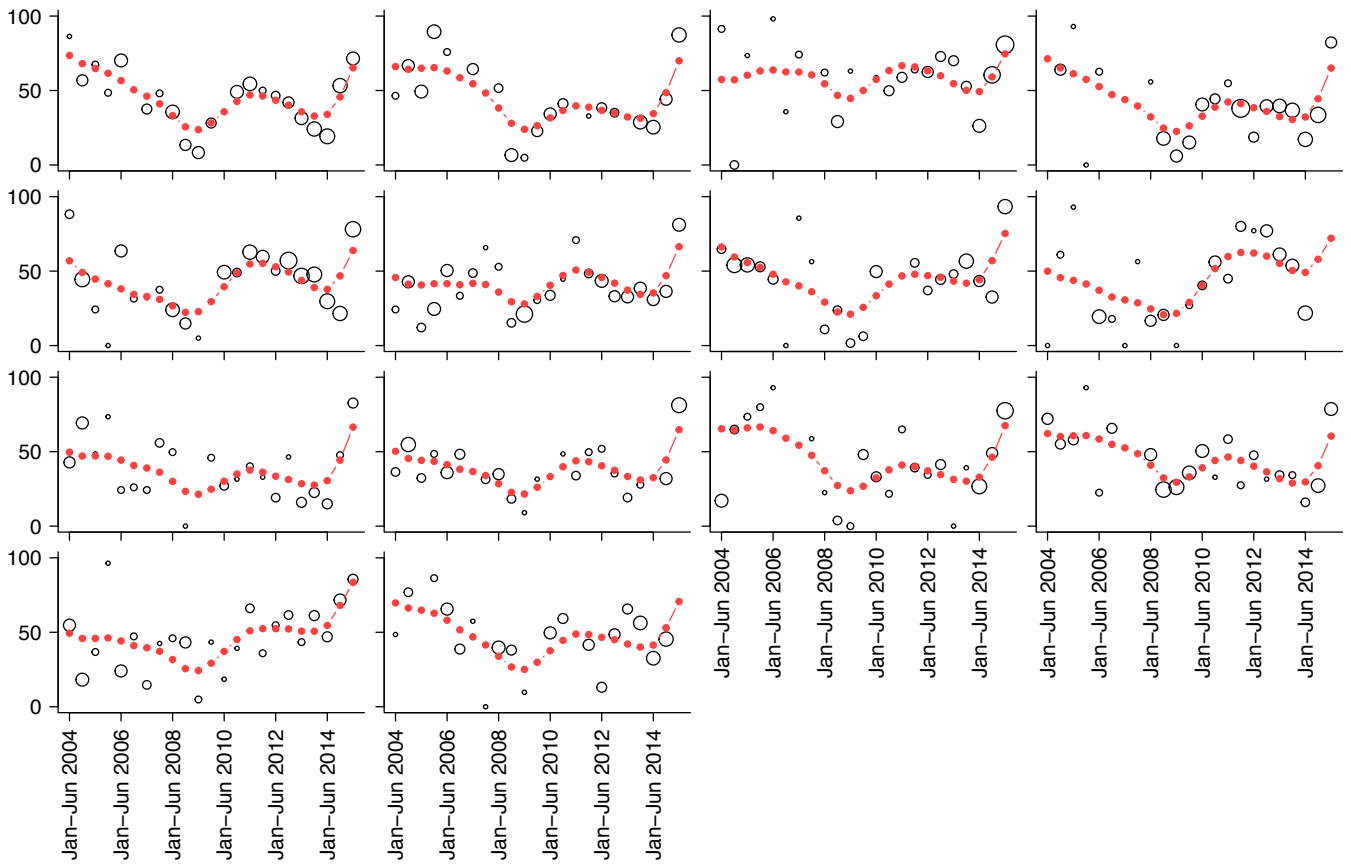

Supplement: pmed.1002140.s002.pdf [file pmed.1002140.s002.pdf]
