# Supplementary material for: Population Immunity against Serotype-2 Poliomyelitis Leading up to the Global Withdrawal of the Oral Poliovirus Vaccine: Spatio-temporal Modelling of Surveillance Data
Source: PubMed Central journal article supplement (PMC5049753; doi:10.1371/journal.pmed.1002140), 2016-10-04

### S3 Text

Crude and estimated serotype-2 population immunity in Pakistan by district and 6-month period from Jan-Jun 2004 to Jan-Jun 2015

Figure XXXIII. Crude (black circles) and estimated (red points) serotype-2 population immunity in each district of Pakistan and 6-month period from Jan-Jun 2004 to Jan-Jun 2015 presented by state in alphabetical order. The size of the black circles indicates the number of non-polio AFP cases that informed that estimate.

### AZAD JAMMU AND KASHMIR (AJK)

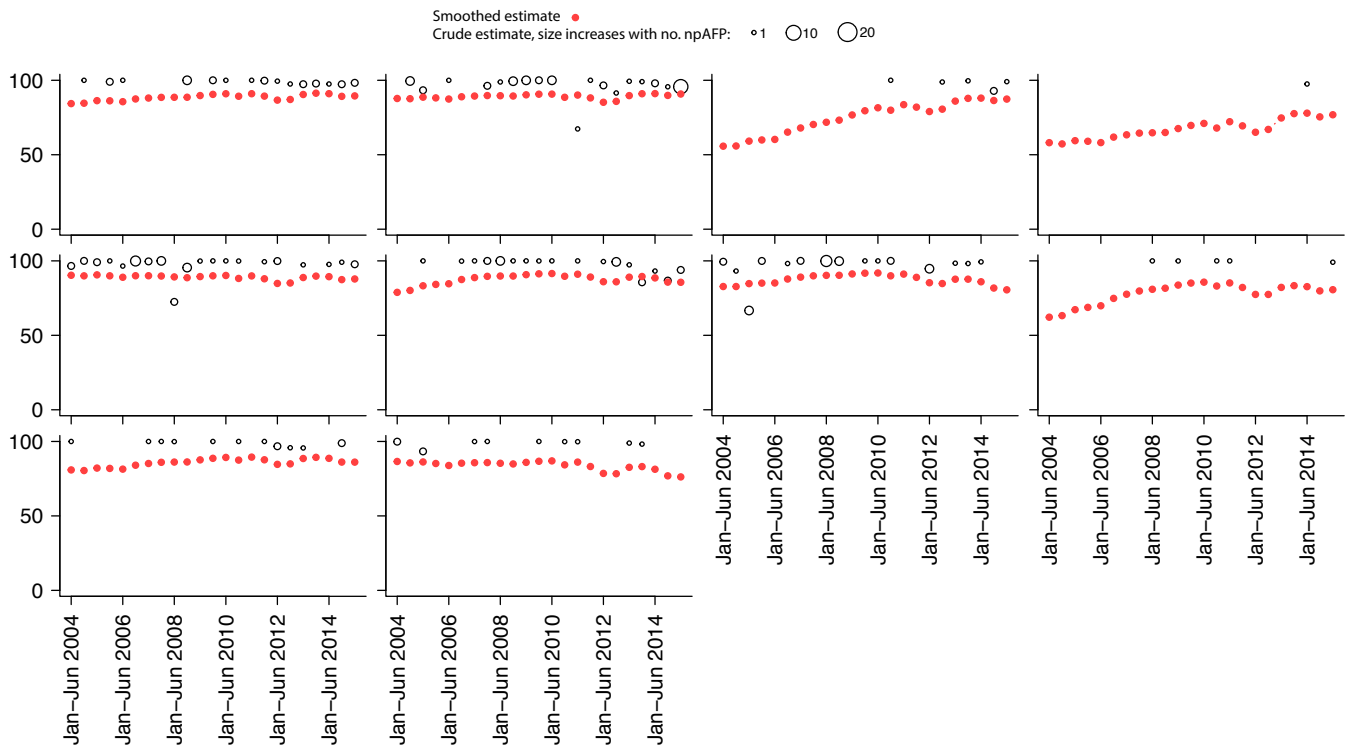

# BALUCHISTAN

Smoothed estimate ●  
Crude estimate, size increases with no. npAFP: ○1 ○10 ○20

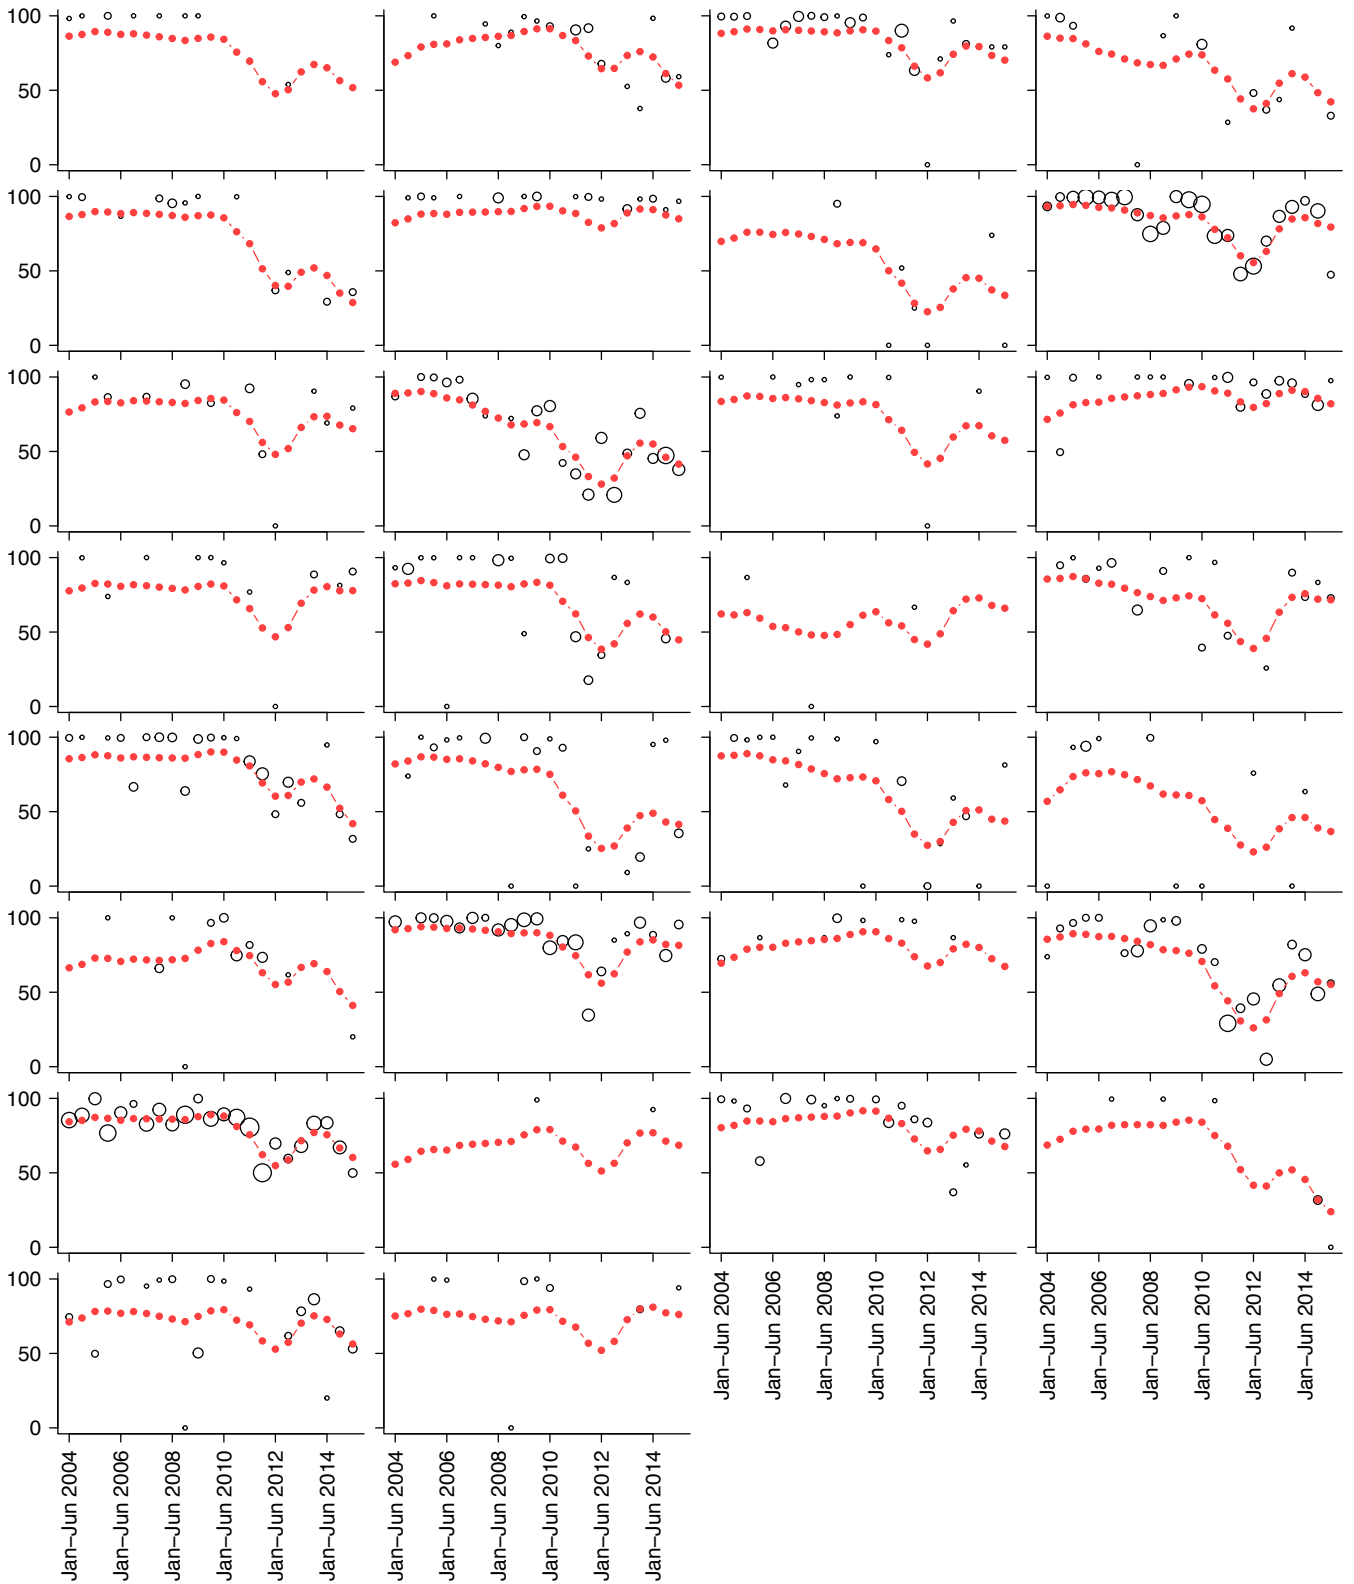

# GILGIT BALTISTAN

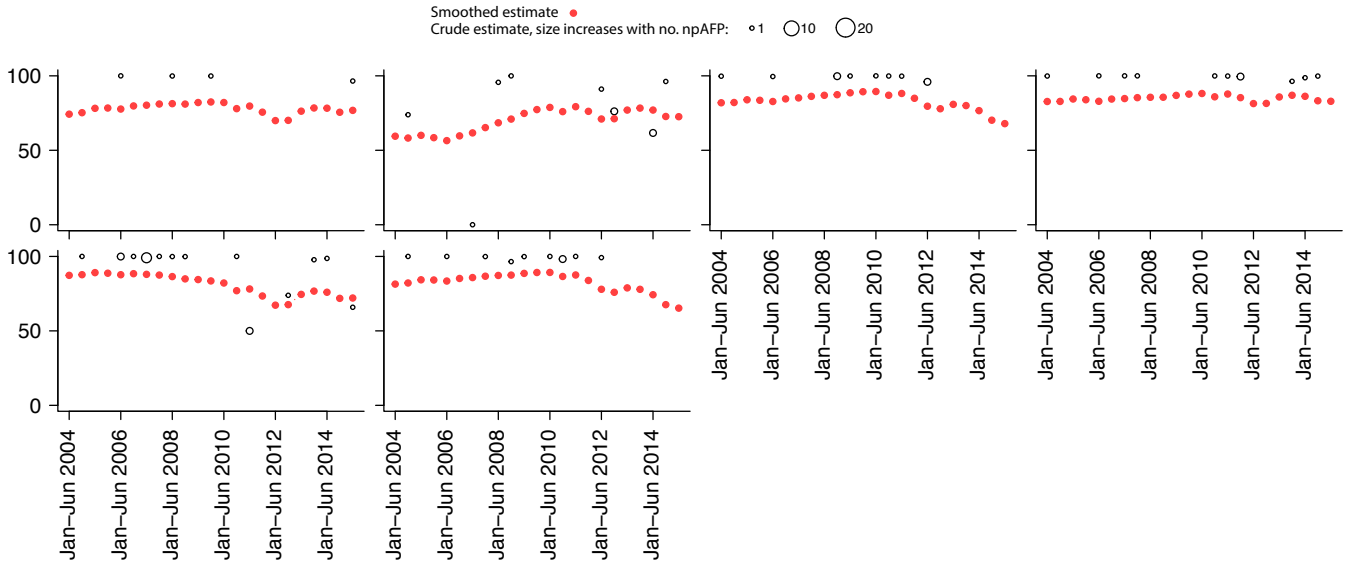

# ISLAMABAD

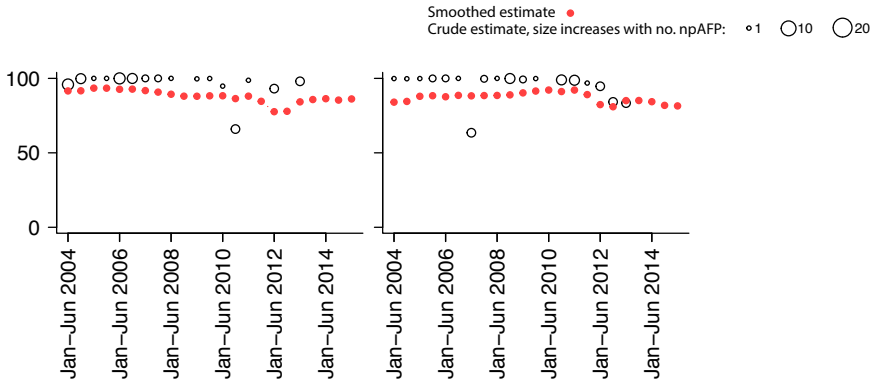

# NORTH-WEST FRONTIER PROVINCE

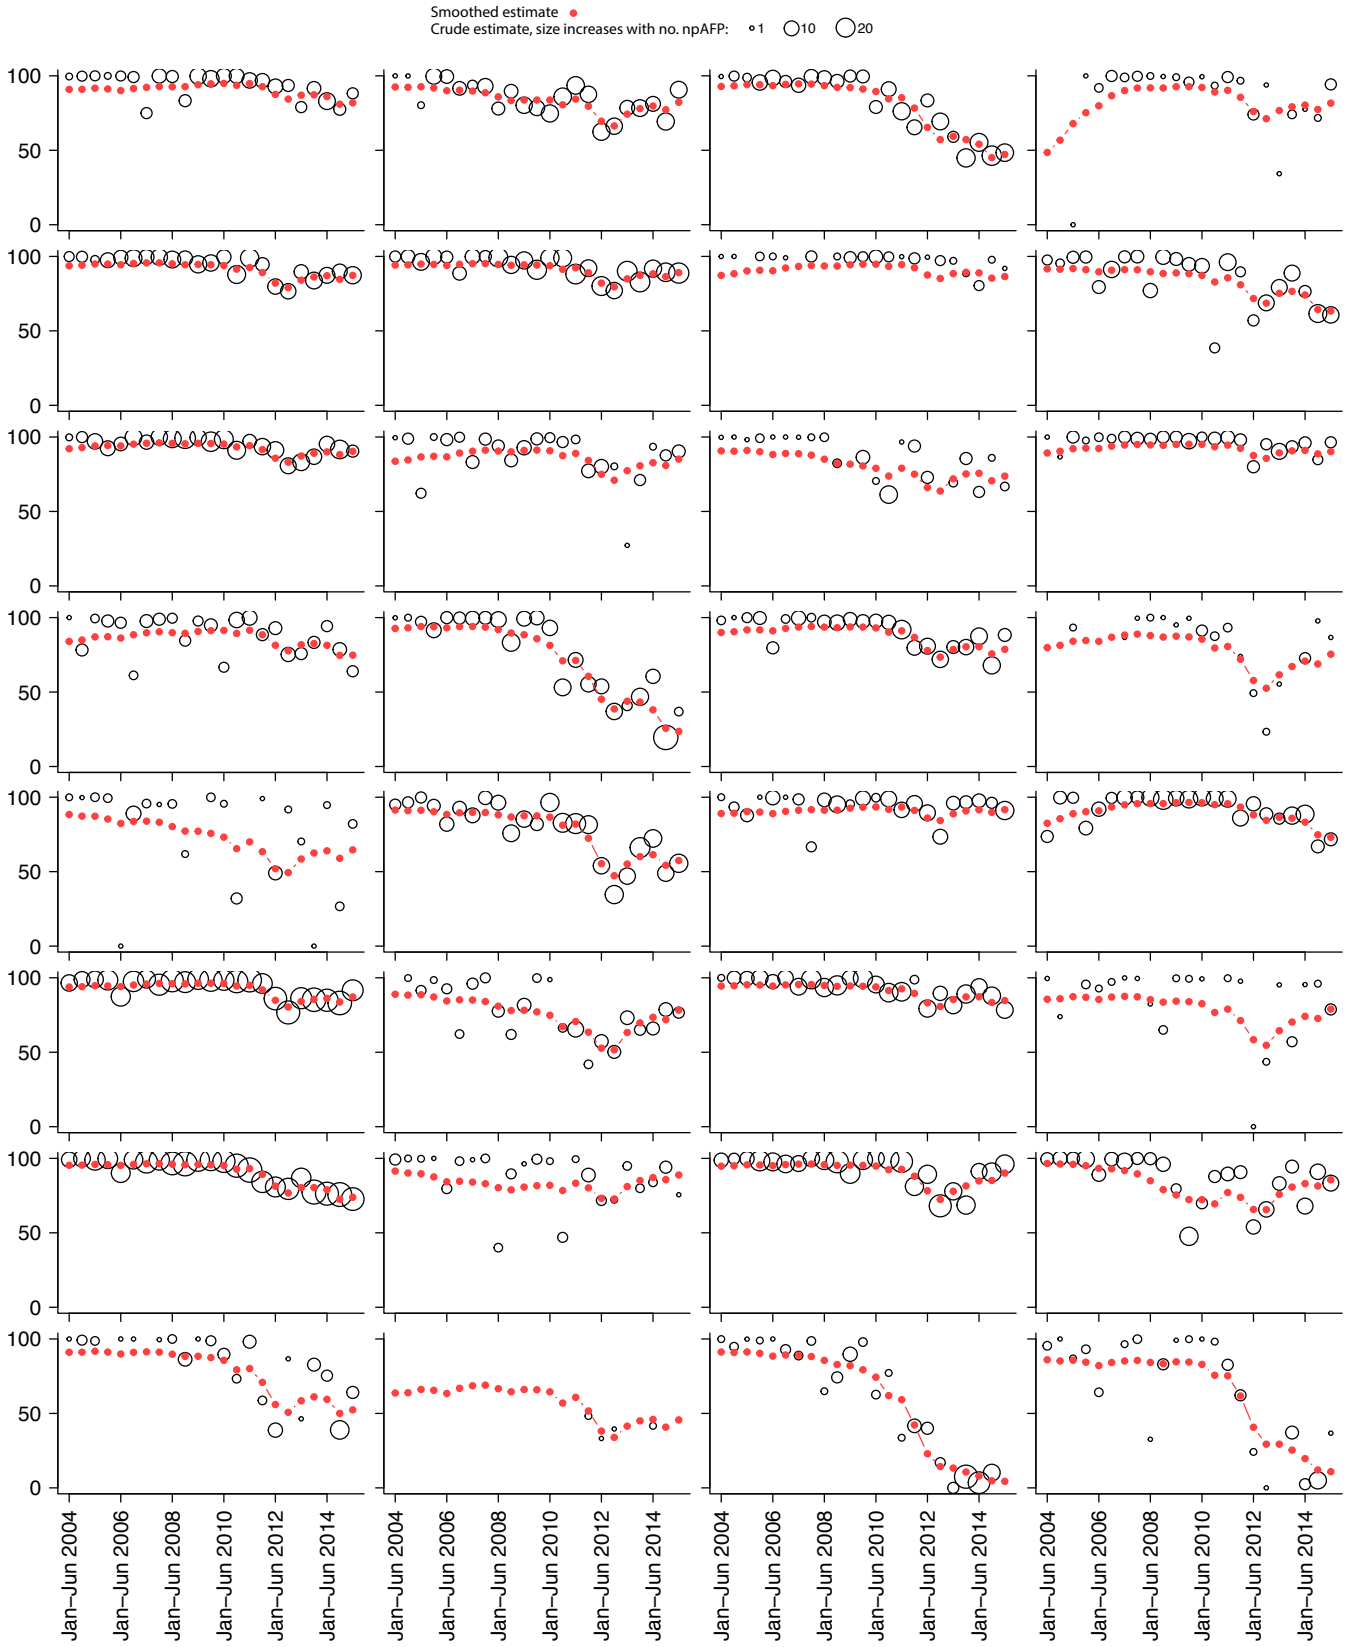

# PUNJAB

Smoothed estimate •  
Crude estimate, size increases with no. npAFP: •1 ○10 ○20

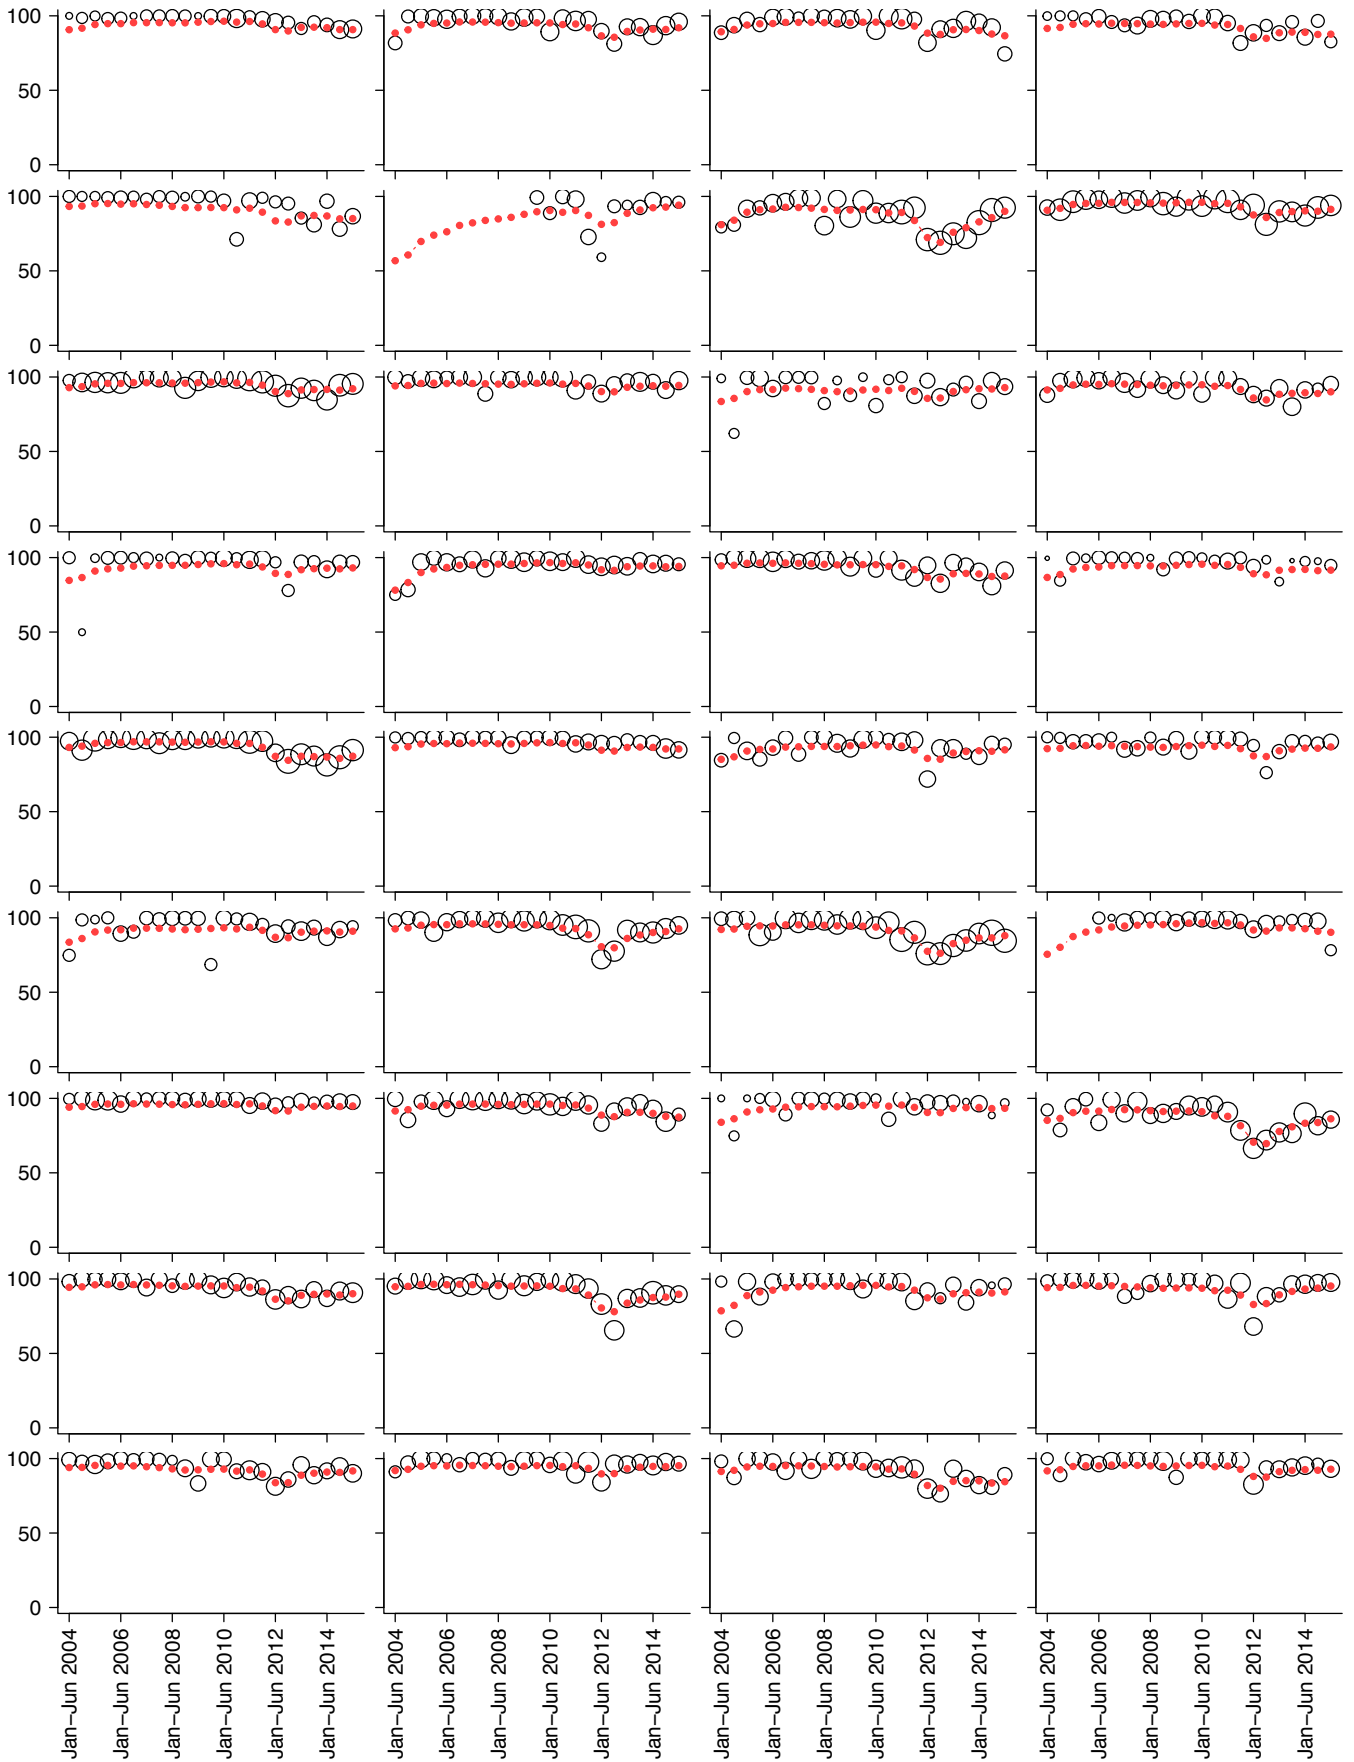

# SINDH

Smoothed estimate ●  
Crude estimate, size increases with no. npAFP: ○1 ○10 ○20

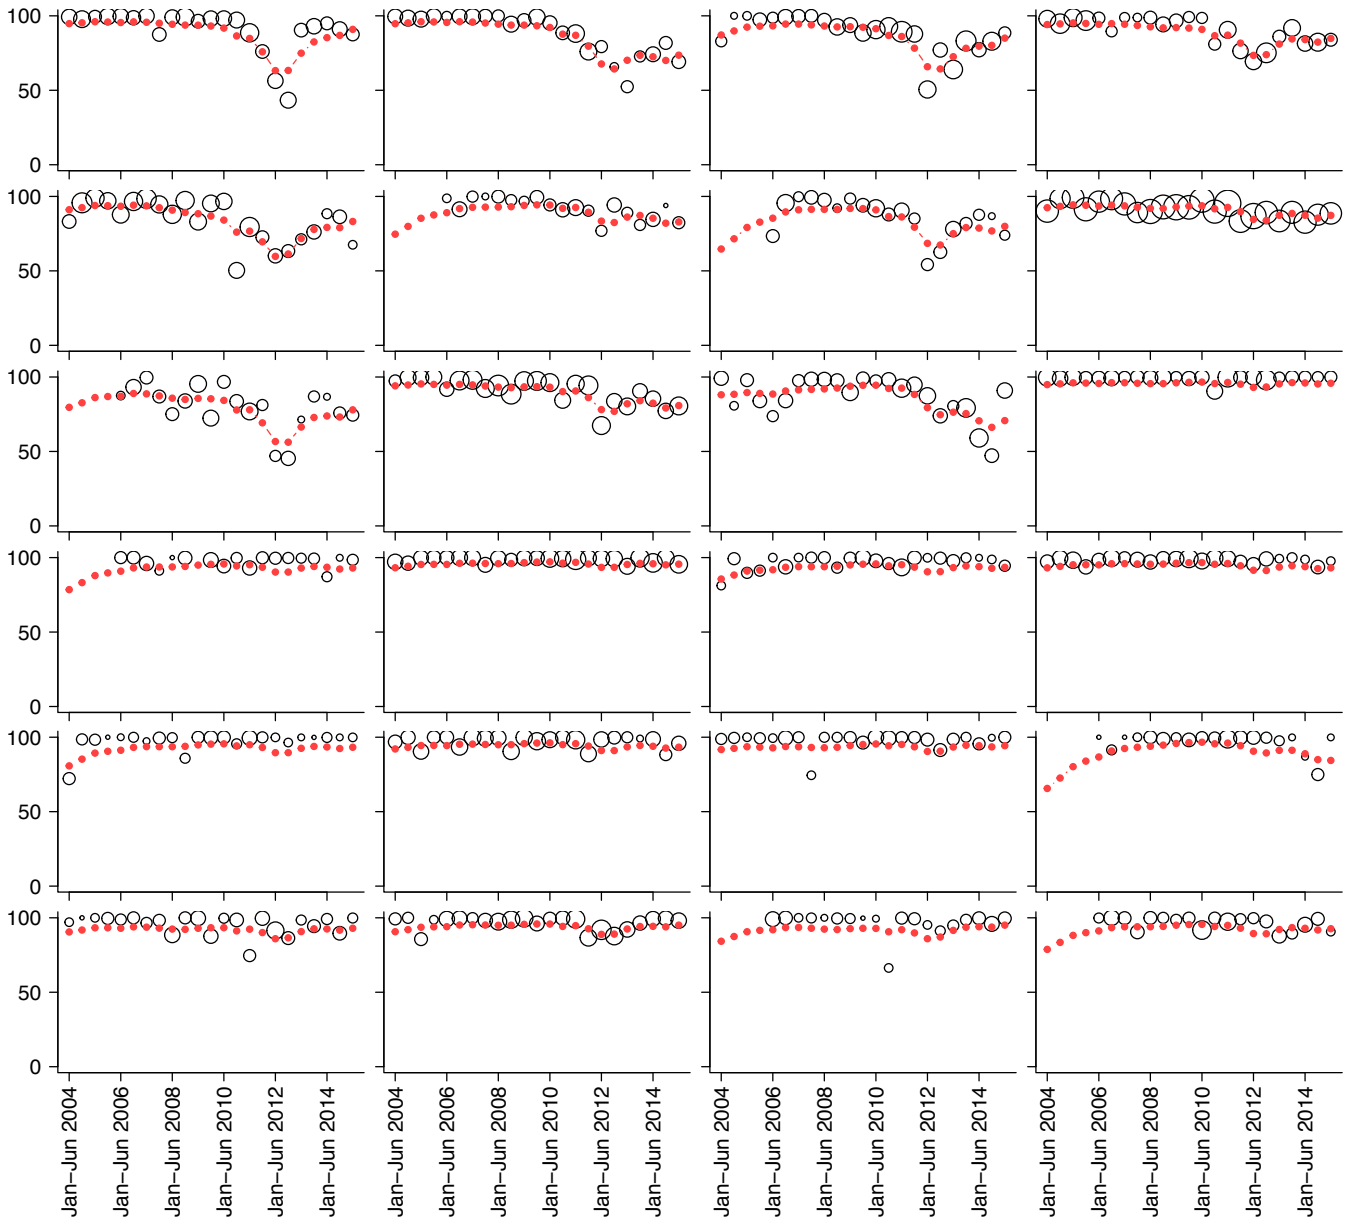

Supplement: pmed.1002140.s003.pdf [file pmed.1002140.s003.pdf]
